# Supplementary material
Source: PubMed Central journal article supplement (PMC5690898)
Supplement: NIHMS876986-supplement-11538_2017_283_MOESM1_ESM.pdf [file NIHMS876986-supplement-11538_2017_283_MOESM1_ESM.pdf]

(\* 3 compartments \*)

In[39]= **Ncomp = 3; Nproc = 10;**

(\* In this example we ave the following processes: Q1 is diff of SCs,  
Q2 prol of SC, Q3 is death of TAs, Q4 is asym div of SCs,  
Q5 is de-diff of TA, Q6 is death of SCs ; Q7 is diff of TA;  
Q8 is de-diff of DC ; Q9 is death of DCs; Q10 is asym diff of TAc \*)  
**R[1] = {-1, 2, 0}; R[2] = {1, 0, 0}; R[3] = {0, -1, 0}; R[4] = {0, 1, 0};**  
**R[5] = {1, -1, 0}; R[6] = {-1, 0, 0};**  
**R[7] = {0, -1, 2}; R[8] = {0, 1, -1}; R[9] = {0, 0, -1}; R[10] = {0, 0, 1};**

In[42]= **QQ = .; Do[Do[Q[i, j] = .; QQ[i] = ., {i, 1, Nproc}], {j, 1, Ncomp}]**

In[43]= (\* See which subsets processes can lead to a nontrivial equilibrium \*)

In[44]= **Do[ee[i] = Sum[QQ[k] \* R[k][[i]], {k, 1, Nproc}] == 0;  
aa[i] = Sum[QQ[k] \* R[k][[i]], {k, 1, Nproc}], {i, 1, Ncomp}];  
EQ = Table[ee[i], {i, 1, Ncomp}]**

Out[44]= **{-QQ[1] + QQ[2] + QQ[5] - QQ[6] == 0,  
2 QQ[1] - QQ[3] + QQ[4] - QQ[5] - QQ[7] + QQ[8] == 0, 2 QQ[7] - QQ[8] - QQ[9] + QQ[10] == 0}**

(\* Study stability \*)

In[47]= **Do[Do[ff[i, j] = Sum[Q[k, j] \* R[k][[i]], {k, 1, Nproc}], {i, 1, Ncomp}], {j, 1, Ncomp}]**

In[48]= **JJ = Table[ff[i, j], {i, 1, Ncomp}, {j, 1, Ncomp}]**

Out[48]= **{{-Q[1, 1] + Q[2, 1] + Q[5, 1] - Q[6, 1],  
-Q[1, 2] + Q[2, 2] + Q[5, 2] - Q[6, 2], -Q[1, 3] + Q[2, 3] + Q[5, 3] - Q[6, 3]},  
{2 Q[1, 1] - Q[3, 1] + Q[4, 1] - Q[5, 1] - Q[7, 1] + Q[8, 1],  
2 Q[1, 2] - Q[3, 2] + Q[4, 2] - Q[5, 2] - Q[7, 2] + Q[8, 2],  
2 Q[1, 3] - Q[3, 3] + Q[4, 3] - Q[5, 3] - Q[7, 3] + Q[8, 3]},  
{2 Q[7, 1] - Q[8, 1] - Q[9, 1] + Q[10, 1], 2 Q[7, 2] - Q[8, 2] - Q[9, 2] + Q[10, 2],  
2 Q[7, 3] - Q[8, 3] - Q[9, 3] + Q[10, 3]}}**

In[49]= **z = .; var[1] = x; var[2] = y; var[3] = z;**

(\* Here the program lists all triplets that can be stable. It  
provides the characteristic polynomial, the Jacobian, and eigenvalues,  
and the number of simply connected components. It also determines if the  
digraph is a tree. In green it lists the stability conditions. The three  
variants of the stability conditions are all equivalent to each other,  
but some of them may have a more compact form than others. \*)

```

cases = 0; cnt1 = 0;
ccc = 0; Do[conn[k] = 0, {k, 1, Ncomp}];
Do[Do[Do[Do[Do[Do[
  Do[Do[Q[i, j] = 0, {i, 1, Nproc}], {j, 1, Ncomp}]; Q[i1, j1] =.; Q[i2, j2] =.;
  Q[i3, j3] =.;
  ku4reduce[1] = Q[i1, j1];
  ku4reduce[2] = Q[i2, j2];
  ku4reduce[3] = Q[i3, j3]; EV = Eigenvalues[JJ];
  CP = -CharacteristicPolynomial[JJ, z];
  EP = Product[Eigenvalues[JJ][[k]], {k, 1, Ncomp}];
  qq = 0; If[N[EP] == 0, qq = 1];
  Len = Length[FactorList[CP]] - 1;
  w1 = 1; w2 = 1;
  (* See if the Trace is zero *) If[Sum[JJ[[i, i]], {i, 1, Ncomp}] == 0, {w1 = 0;
    qq = 1 (*Print["Discard! Zero trace!"]*)}];

  (*If there is a term missing from the characteristic polynomial *)
  Do[coe[j] = Coefficient[CP, z, j], {j, 0, Ncomp}];
  If[coe[0] * coe[3] == coe[1] * coe[2], {qq = 1 (*
    Print["Discard because of RH "]*)}];
  If[Product[coe[j], {j, 0, Ncomp}] == 0, {w2 = 0; qq = 1 (*Print[
    "Discard! Term missing from the characteristic polynomial!"]*)}];

  If[Len == 1, {cnt1 = cnt1 + 1;
    (* See if the # of elements is <5 *) If[Sum[Sum[If[NumberQ[JJ[[i, j]]],
      0, 1], {i, 1, Ncomp}], {j, 1, Ncomp}] < 5, {w2 = 0;
      qq = 1 (* Print["Discard! Less than 5 elements!"]*)}];
    If[Simplify[coe[0] / coe[1] / coe[2]] == -1, qq = 1]
  ]}

  If[qq == 0 && Len == 1, {cases = cases + 1;
    CPx[cases] = CP;
    Print[Style["#", 18, Blue], Style[cases, 18, Blue]];
    Print["Triplet: ", "Q", i1,
      var[j1], " ", "Q", i2, var[j2], " ", "Q", i3, var[j3]];
    Print["Eigenvalues: ", Eigenvalues[JJ]];
    Print["Char Polyn=", CP];
    Print[Len, " connected components"];
    Print["Jacobian=", JJ];
    conn[Len] = conn[Len] + 1;
    Print[Style["Stability conditions", 12, Green]];
    Do[Print[Style[k, 12, Green]];
      Print[Reduce[{{coe[0] > 0, coe[1] > 0, coe[2] > 0, coe[3] > 0, Simplify[
        coe[1] * coe[2] - coe[3] * coe[0]] > 0}, ku4reduce[k]]], {k, 1, 3}];
    If[JJ[[1, 2]] * JJ[[2, 3]] * JJ[[3, 1]] == 0 && JJ[[2, 1]] * JJ[[1, 3]] *
      JJ[[3, 2]] == 0, Print[Style["The digraph is a tree", 12, Gray]]];
    Print[
      ]], {i1, 1, i2 - 1}], {j1, 1, Ncomp}], {i2, 1, i3 - 1}], {j2, 1, Ncomp}],
    {i3, 1, Nproc}], {j3, 1, Ncomp}]]

```

#1

Triplet: Q1z Q5y Q7x

Eigenvalues: {Root[  
 $-2 Q[1, 3] Q[5, 2] Q[7, 1] + (2 Q[1, 3] Q[7, 1] + Q[5, 2] Q[7, 1]) \#1 + Q[5, 2] \#1^2 + \#1^3 \&, 1]$ ,  
 Root[ $-2 Q[1, 3] Q[5, 2] Q[7, 1] + (2 Q[1, 3] Q[7, 1] + Q[5, 2] Q[7, 1]) \#1 + Q[5, 2] \#1^2 + \#1^3 \&$ ,  
 2], Root[  
 $-2 Q[1, 3] Q[5, 2] Q[7, 1] + (2 Q[1, 3] Q[7, 1] + Q[5, 2] Q[7, 1]) \#1 + Q[5, 2] \#1^2 + \#1^3 \&, 3]$ }

Char Polyn= $z^3 + z^2 Q[5, 2] + 2 z Q[1, 3] Q[7, 1] + z Q[5, 2] Q[7, 1] - 2 Q[1, 3] Q[5, 2] Q[7, 1]$

1 connected components

Jacobian={{0, Q[5, 2], -Q[1, 3]}, {-Q[7, 1], -Q[5, 2], 2 Q[1, 3]}, {2 Q[7, 1], 0, 0}}

Stability conditions

1

$$Q[7, 1] > 0 \ \&\& \ Q[5, 2] > 0 \ \&\& \ -\frac{1}{4} Q[5, 2] < Q[1, 3] < 0$$

2

$$Q[7, 1] > 0 \ \&\& \ Q[1, 3] < 0 \ \&\& \ Q[5, 2] > -4 Q[1, 3]$$

3

$$Q[5, 2] > 0 \ \&\& \ -\frac{1}{4} Q[5, 2] < Q[1, 3] < 0 \ \&\& \ Q[7, 1] > 0$$

#2

Triplet: Q2z Q5y Q7x

Eigenvalues: {Root[  
 $-2 Q[2, 3] Q[5, 2] Q[7, 1] + (-2 Q[2, 3] Q[7, 1] + Q[5, 2] Q[7, 1]) \#1 + Q[5, 2] \#1^2 + \#1^3 \&, 1]$ ,  
 Root[ $-2 Q[2, 3] Q[5, 2] Q[7, 1] + (-2 Q[2, 3] Q[7, 1] + Q[5, 2] Q[7, 1]) \#1 + Q[5, 2] \#1^2 + \#1^3 \&$ ,  
 2], Root[  
 $-2 Q[2, 3] Q[5, 2] Q[7, 1] + (-2 Q[2, 3] Q[7, 1] + Q[5, 2] Q[7, 1]) \#1 + Q[5, 2] \#1^2 + \#1^3 \&, 3]$ }

Char Polyn= $z^3 + z^2 Q[5, 2] - 2 z Q[2, 3] Q[7, 1] + z Q[5, 2] Q[7, 1] - 2 Q[2, 3] Q[5, 2] Q[7, 1]$

1 connected components

Jacobian={{0, Q[5, 2], Q[2, 3]}, {-Q[7, 1], -Q[5, 2], 0}, {2 Q[7, 1], 0, 0}}

Stability conditions

1

$$Q[7, 1] > 0 \ \&\& \ Q[5, 2] > 0 \ \&\& \ Q[2, 3] < 0$$

2

$$Q[7, 1] > 0 \ \&\& \ Q[2, 3] < 0 \ \&\& \ Q[5, 2] > 0$$

3

$$Q[5, 2] > 0 \ \&\& \ Q[2, 3] < 0 \ \&\& \ Q[7, 1] > 0$$

The digraphs is a tree

#3

Triplet: Q3z Q5y Q7x

Eigenvalues:  $\left\{ \text{Root}\left[2 Q[3, 3] Q[5, 2] Q[7, 1] + Q[5, 2] Q[7, 1] \#1 + Q[5, 2] \#1^2 + \#1^3 \ \&, 1\right], \right.$   
 $\text{Root}\left[2 Q[3, 3] Q[5, 2] Q[7, 1] + Q[5, 2] Q[7, 1] \#1 + Q[5, 2] \#1^2 + \#1^3 \ \&, 2\right],$   
 $\left. \text{Root}\left[2 Q[3, 3] Q[5, 2] Q[7, 1] + Q[5, 2] Q[7, 1] \#1 + Q[5, 2] \#1^2 + \#1^3 \ \&, 3\right] \right\}$

Char Polyn= $z^3 + z^2 Q[5, 2] + z Q[5, 2] Q[7, 1] + 2 Q[3, 3] Q[5, 2] Q[7, 1]$

1 connected components

Jacobian= $\left\{ \{0, Q[5, 2], 0\}, \{-Q[7, 1], -Q[5, 2], -Q[3, 3]\}, \{2 Q[7, 1], 0, 0\} \right\}$

Stability conditions

1

$$Q[7, 1] > 0 \ \&\& \ Q[5, 2] > 0 \ \&\& \ 0 < Q[3, 3] < \frac{1}{2} Q[5, 2]$$

2

$$Q[7, 1] > 0 \ \&\& \ Q[3, 3] > 0 \ \&\& \ Q[5, 2] > 2 Q[3, 3]$$

3

$$Q[5, 2] > 0 \ \&\& \ 0 < Q[3, 3] < \frac{1}{2} Q[5, 2] \ \&\& \ Q[7, 1] > 0$$

#4

Triplet: Q4z Q5y Q7x

Eigenvalues:  $\left\{ \text{Root}\left[-2 Q[4, 3] Q[5, 2] Q[7, 1] + Q[5, 2] Q[7, 1] \#1 + Q[5, 2] \#1^2 + \#1^3 \ \&, 1\right], \right.$   
 $\text{Root}\left[-2 Q[4, 3] Q[5, 2] Q[7, 1] + Q[5, 2] Q[7, 1] \#1 + Q[5, 2] \#1^2 + \#1^3 \ \&, 2\right],$   
 $\left. \text{Root}\left[-2 Q[4, 3] Q[5, 2] Q[7, 1] + Q[5, 2] Q[7, 1] \#1 + Q[5, 2] \#1^2 + \#1^3 \ \&, 3\right] \right\}$

Char Polyn= $z^3 + z^2 Q[5, 2] + z Q[5, 2] Q[7, 1] - 2 Q[4, 3] Q[5, 2] Q[7, 1]$

1 connected components

Jacobian= $\left\{ \{0, Q[5, 2], 0\}, \{-Q[7, 1], -Q[5, 2], Q[4, 3]\}, \{2 Q[7, 1], 0, 0\} \right\}$

Stability conditions

1

$$Q[7, 1] > 0 \ \&\& \ Q[5, 2] > 0 \ \&\& \ -\frac{1}{2} Q[5, 2] < Q[4, 3] < 0$$

2

$$Q[7, 1] > 0 \ \&\& \ Q[4, 3] < 0 \ \&\& \ Q[5, 2] > -2 Q[4, 3]$$

3

$$Q[5, 2] > 0 \ \&\& \ -\frac{1}{2} Q[5, 2] < Q[4, 3] < 0 \ \&\& \ Q[7, 1] > 0$$

#5

Triplet: Q1y Q2z Q7x

Eigenvalues: {Root[  
 $4 Q[1, 2] Q[2, 3] Q[7, 1] + (-Q[1, 2] Q[7, 1] - 2 Q[2, 3] Q[7, 1]) \#1 - 2 Q[1, 2] \#1^2 + \#1^3 \&, 1]$ ,  
 Root[ $4 Q[1, 2] Q[2, 3] Q[7, 1] + (-Q[1, 2] Q[7, 1] - 2 Q[2, 3] Q[7, 1]) \#1 - 2 Q[1, 2] \#1^2 + \#1^3 \&$ ,  
 2], Root[  
 $4 Q[1, 2] Q[2, 3] Q[7, 1] + (-Q[1, 2] Q[7, 1] - 2 Q[2, 3] Q[7, 1]) \#1 - 2 Q[1, 2] \#1^2 + \#1^3 \&, 3]$ }

Char Polyn= $z^3 - 2 z^2 Q[1, 2] - z Q[1, 2] Q[7, 1] - 2 z Q[2, 3] Q[7, 1] + 4 Q[1, 2] Q[2, 3] Q[7, 1]$

1 connected components

Jacobian={{0, -Q[1, 2], Q[2, 3]}, {-Q[7, 1], 2 Q[1, 2], 0}, {2 Q[7, 1], 0, 0}}

Stability conditions

1

$Q[7, 1] > 0 \&\& Q[2, 3] < 0 \&\& Q[1, 2] < 0$

2

$Q[7, 1] > 0 \&\& Q[1, 2] < 0 \&\& Q[2, 3] < 0$

3

$Q[2, 3] < 0 \&\& Q[1, 2] < 0 \&\& Q[7, 1] > 0$

The digraphs is a tree

## #6

Triplet: Q1y Q3z Q7x

Eigenvalues: {Root[-2 Q[1, 2] Q[3, 3] Q[7, 1] - Q[1, 2] Q[7, 1] \#1 - 2 Q[1, 2] \#1^2 + \#1^3 \&, 1],  
 Root[-2 Q[1, 2] Q[3, 3] Q[7, 1] - Q[1, 2] Q[7, 1] \#1 - 2 Q[1, 2] \#1^2 + \#1^3 \&, 2],  
 Root[-2 Q[1, 2] Q[3, 3] Q[7, 1] - Q[1, 2] Q[7, 1] \#1 - 2 Q[1, 2] \#1^2 + \#1^3 \&, 3]}

Char Polyn= $z^3 - 2 z^2 Q[1, 2] - z Q[1, 2] Q[7, 1] - 2 Q[1, 2] Q[3, 3] Q[7, 1]$

1 connected components

Jacobian={{0, -Q[1, 2], 0}, {-Q[7, 1], 2 Q[1, 2], -Q[3, 3]}, {2 Q[7, 1], 0, 0}}

Stability conditions

1

$Q[7, 1] > 0 \&\& Q[3, 3] > 0 \&\& Q[1, 2] < -Q[3, 3]$

2

$Q[7, 1] > 0 \&\& Q[1, 2] < 0 \&\& 0 < Q[3, 3] < -Q[1, 2]$

3

$Q[3, 3] > 0 \&\& Q[1, 2] < -Q[3, 3] \&\& Q[7, 1] > 0$

## #7

Triplet: Q1y Q4z Q7x

Eigenvalues: {Root[2 Q[1, 2] Q[4, 3] Q[7, 1] - Q[1, 2] Q[7, 1] \#1 - 2 Q[1, 2] \#1^2 + \#1^3 \&, 1],  
 Root[2 Q[1, 2] Q[4, 3] Q[7, 1] - Q[1, 2] Q[7, 1] \#1 - 2 Q[1, 2] \#1^2 + \#1^3 \&, 2],  
 Root[2 Q[1, 2] Q[4, 3] Q[7, 1] - Q[1, 2] Q[7, 1] \#1 - 2 Q[1, 2] \#1^2 + \#1^3 \&, 3]}

```
Char Polyn=z3 - 2 z2 Q[1, 2] - z Q[1, 2] Q[7, 1] + 2 Q[1, 2] Q[4, 3] Q[7, 1]
1 connected components
Jacobian={{0, -Q[1, 2], 0}, {-Q[7, 1], 2 Q[1, 2], Q[4, 3]}, {2 Q[7, 1], 0, 0}}
```

Stability conditions

```
1
Q[7, 1] > 0 && Q[4, 3] < 0 && Q[1, 2] < Q[4, 3]
2
Q[7, 1] > 0 && Q[1, 2] < 0 && Q[1, 2] < Q[4, 3] < 0
3
Q[4, 3] < 0 && Q[1, 2] < Q[4, 3] && Q[7, 1] > 0
```

### #8

Triplet: Q1y Q5z Q7x

```
Eigenvalues: {Root[
  2 Q[1, 2] Q[5, 3] Q[7, 1] + (-Q[1, 2] Q[7, 1] - 2 Q[5, 3] Q[7, 1]) #1 - 2 Q[1, 2] #12 + #13 &, 1],
  Root[2 Q[1, 2] Q[5, 3] Q[7, 1] + (-Q[1, 2] Q[7, 1] - 2 Q[5, 3] Q[7, 1]) #1 - 2 Q[1, 2] #12 + #13 &,
  2], Root[
  2 Q[1, 2] Q[5, 3] Q[7, 1] + (-Q[1, 2] Q[7, 1] - 2 Q[5, 3] Q[7, 1]) #1 - 2 Q[1, 2] #12 + #13 &, 3]}
```

```
Char Polyn=z3 - 2 z2 Q[1, 2] - z Q[1, 2] Q[7, 1] - 2 z Q[5, 3] Q[7, 1] + 2 Q[1, 2] Q[5, 3] Q[7, 1]
```

1 connected components

```
Jacobian={{0, -Q[1, 2], Q[5, 3]}, {-Q[7, 1], 2 Q[1, 2], -Q[5, 3]}, {2 Q[7, 1], 0, 0}}
```

Stability conditions

```
1
(Q[7, 1] < 0 && Q[5, 3] > 0 && -Q[5, 3] < Q[1, 2] < 0) || (Q[7, 1] > 0 && Q[5, 3] < 0 && Q[1, 2] < 0)
2
(Q[7, 1] < 0 && Q[1, 2] < 0 && Q[5, 3] > -Q[1, 2]) || (Q[7, 1] > 0 && Q[1, 2] < 0 && Q[5, 3] < 0)
3
(Q[5, 3] < 0 && Q[1, 2] < 0 && Q[7, 1] > 0) || (Q[5, 3] > 0 && -Q[5, 3] < Q[1, 2] < 0 && Q[7, 1] < 0)
```

### #9

Triplet: Q1y Q6z Q7x

```
Eigenvalues: {Root[
  -4 Q[1, 2] Q[6, 3] Q[7, 1] + (-Q[1, 2] Q[7, 1] + 2 Q[6, 3] Q[7, 1]) #1 - 2 Q[1, 2] #12 + #13 &, 1],
  Root[-4 Q[1, 2] Q[6, 3] Q[7, 1] + (-Q[1, 2] Q[7, 1] + 2 Q[6, 3] Q[7, 1]) #1 - 2 Q[1, 2] #12 + #13 &,
  2], Root[
  -4 Q[1, 2] Q[6, 3] Q[7, 1] + (-Q[1, 2] Q[7, 1] + 2 Q[6, 3] Q[7, 1]) #1 - 2 Q[1, 2] #12 + #13 &, 3]}
```

```
Char Polyn=z3 - 2 z2 Q[1, 2] - z Q[1, 2] Q[7, 1] + 2 z Q[6, 3] Q[7, 1] - 4 Q[1, 2] Q[6, 3] Q[7, 1]
```

1 connected components

Jacobian={{0, -Q[1, 2], -Q[6, 3]}, {-Q[7, 1], 2 Q[1, 2], 0}, {2 Q[7, 1], 0, 0}}

Stability conditions

1

$Q[7, 1] > 0 \ \&\& \ Q[6, 3] > 0 \ \&\& \ Q[1, 2] < 0$

2

$Q[7, 1] > 0 \ \&\& \ Q[1, 2] < 0 \ \&\& \ Q[6, 3] > 0$

3

$Q[6, 3] > 0 \ \&\& \ Q[1, 2] < 0 \ \&\& \ Q[7, 1] > 0$

The digraphs is a tree

## #10

Triplet: Q5y Q6z Q7x

Eigenvalues:

$$\left\{ \begin{array}{l} \text{Root}\left[2 Q[5, 2] Q[6, 3] Q[7, 1] + (Q[5, 2] Q[7, 1] + 2 Q[6, 3] Q[7, 1]) \#1 + Q[5, 2] \#1^2 + \#1^3 \ \&, 1\right], \\ \text{Root}\left[2 Q[5, 2] Q[6, 3] Q[7, 1] + (Q[5, 2] Q[7, 1] + 2 Q[6, 3] Q[7, 1]) \#1 + Q[5, 2] \#1^2 + \#1^3 \ \&, 2\right], \\ \text{Root}\left[2 Q[5, 2] Q[6, 3] Q[7, 1] + (Q[5, 2] Q[7, 1] + 2 Q[6, 3] Q[7, 1]) \#1 + Q[5, 2] \#1^2 + \#1^3 \ \&, 3\right] \end{array} \right\}$$

Char Polyn= $z^3 + z^2 Q[5, 2] + z Q[5, 2] Q[7, 1] + 2 z Q[6, 3] Q[7, 1] + 2 Q[5, 2] Q[6, 3] Q[7, 1]$

1 connected components

Jacobian={{0, Q[5, 2], -Q[6, 3]}, {-Q[7, 1], -Q[5, 2], 0}, {2 Q[7, 1], 0, 0}}

Stability conditions

1

$Q[7, 1] > 0 \ \&\& \ Q[6, 3] > 0 \ \&\& \ Q[5, 2] > 0$

2

$Q[7, 1] > 0 \ \&\& \ Q[5, 2] > 0 \ \&\& \ Q[6, 3] > 0$

3

$Q[6, 3] > 0 \ \&\& \ Q[5, 2] > 0 \ \&\& \ Q[7, 1] > 0$

The digraphs is a tree

## #11

Triplet: Q1z Q5y Q8x

Eigenvalues:

$$\left\{ \begin{array}{l} \text{Root}\left[Q[1, 3] Q[5, 2] Q[8, 1] + (-Q[1, 3] Q[8, 1] - Q[5, 2] Q[8, 1]) \#1 + Q[5, 2] \#1^2 + \#1^3 \ \&, 1\right], \\ \text{Root}\left[Q[1, 3] Q[5, 2] Q[8, 1] + (-Q[1, 3] Q[8, 1] - Q[5, 2] Q[8, 1]) \#1 + Q[5, 2] \#1^2 + \#1^3 \ \&, 2\right], \\ \text{Root}\left[Q[1, 3] Q[5, 2] Q[8, 1] + (-Q[1, 3] Q[8, 1] - Q[5, 2] Q[8, 1]) \#1 + Q[5, 2] \#1^2 + \#1^3 \ \&, 3\right] \end{array} \right\}$$

Char Polyn= $z^3 + z^2 Q[5, 2] - z Q[1, 3] Q[8, 1] - z Q[5, 2] Q[8, 1] + Q[1, 3] Q[5, 2] Q[8, 1]$

1 connected components

Jacobian={{0, Q[5, 2], -Q[1, 3]}, {Q[8, 1], -Q[5, 2], 2 Q[1, 3]}, {-Q[8, 1], 0, 0}}

Stability conditions

1

$$Q[8, 1] < 0 \ \&\& \ Q[5, 2] > 0 \ \&\& \ -\frac{1}{2} Q[5, 2] < Q[1, 3] < 0$$

2

$$Q[8, 1] < 0 \ \&\& \ Q[1, 3] < 0 \ \&\& \ Q[5, 2] > -2 Q[1, 3]$$

3

$$Q[5, 2] > 0 \ \&\& \ -\frac{1}{2} Q[5, 2] < Q[1, 3] < 0 \ \&\& \ Q[8, 1] < 0$$

## #12

Triplet: Q2z Q5y Q8x

Eigenvalues:

$$\left\{ \begin{array}{l} \text{Root}\left[Q[2, 3] Q[5, 2] Q[8, 1] + (Q[2, 3] Q[8, 1] - Q[5, 2] Q[8, 1]) \#1 + Q[5, 2] \#1^2 + \#1^3 \ \&, 1\right], \\ \text{Root}\left[Q[2, 3] Q[5, 2] Q[8, 1] + (Q[2, 3] Q[8, 1] - Q[5, 2] Q[8, 1]) \#1 + Q[5, 2] \#1^2 + \#1^3 \ \&, 2\right], \\ \text{Root}\left[Q[2, 3] Q[5, 2] Q[8, 1] + (Q[2, 3] Q[8, 1] - Q[5, 2] Q[8, 1]) \#1 + Q[5, 2] \#1^2 + \#1^3 \ \&, 3\right] \end{array} \right\}$$

$$\text{Char Polyn} = z^3 + z^2 Q[5, 2] + z Q[2, 3] Q[8, 1] - z Q[5, 2] Q[8, 1] + Q[2, 3] Q[5, 2] Q[8, 1]$$

1 connected components

$$\text{Jacobian} = \left\{ \{0, Q[5, 2], Q[2, 3]\}, \{Q[8, 1], -Q[5, 2], 0\}, \{-Q[8, 1], 0, 0\} \right\}$$

Stability conditions

1

$$Q[8, 1] < 0 \ \&\& \ Q[5, 2] > 0 \ \&\& \ Q[2, 3] < 0$$

2

$$Q[8, 1] < 0 \ \&\& \ Q[2, 3] < 0 \ \&\& \ Q[5, 2] > 0$$

3

$$Q[5, 2] > 0 \ \&\& \ Q[2, 3] < 0 \ \&\& \ Q[8, 1] < 0$$

The digraphs is a tree

## #13

Triplet: Q3z Q5y Q8x

$$\text{Eigenvalues: } \left\{ \begin{array}{l} \text{Root}\left[-Q[3, 3] Q[5, 2] Q[8, 1] - Q[5, 2] Q[8, 1] \#1 + Q[5, 2] \#1^2 + \#1^3 \ \&, 1\right], \\ \text{Root}\left[-Q[3, 3] Q[5, 2] Q[8, 1] - Q[5, 2] Q[8, 1] \#1 + Q[5, 2] \#1^2 + \#1^3 \ \&, 2\right], \\ \text{Root}\left[-Q[3, 3] Q[5, 2] Q[8, 1] - Q[5, 2] Q[8, 1] \#1 + Q[5, 2] \#1^2 + \#1^3 \ \&, 3\right] \end{array} \right\}$$

$$\text{Char Polyn} = z^3 + z^2 Q[5, 2] - z Q[5, 2] Q[8, 1] - Q[3, 3] Q[5, 2] Q[8, 1]$$

1 connected components

$$\text{Jacobian} = \left\{ \{0, Q[5, 2], 0\}, \{Q[8, 1], -Q[5, 2], -Q[3, 3]\}, \{-Q[8, 1], 0, 0\} \right\}$$

Stability conditions

1

$$Q[8, 1] < 0 \ \&\& \ Q[5, 2] > 0 \ \&\& \ 0 < Q[3, 3] < Q[5, 2]$$

2



$$Q[8, 1] < 0 \ \&\& \ Q[3, 3] > 0 \ \&\& \ Q[5, 2] > Q[3, 3]$$

3

$$Q[5, 2] > 0 \ \&\& \ 0 < Q[3, 3] < Q[5, 2] \ \&\& \ Q[8, 1] < 0$$

#### #14

Triplet: Q4z Q5y Q8x

$$\text{Eigenvalues: } \left\{ \begin{array}{l} \text{Root}\left[Q[4, 3] Q[5, 2] Q[8, 1] - Q[5, 2] Q[8, 1] \#1 + Q[5, 2] \#1^2 + \#1^3 \ \& , 1\right], \\ \text{Root}\left[Q[4, 3] Q[5, 2] Q[8, 1] - Q[5, 2] Q[8, 1] \#1 + Q[5, 2] \#1^2 + \#1^3 \ \& , 2\right], \\ \text{Root}\left[Q[4, 3] Q[5, 2] Q[8, 1] - Q[5, 2] Q[8, 1] \#1 + Q[5, 2] \#1^2 + \#1^3 \ \& , 3\right] \end{array} \right\}$$

$$\text{Char Polyn} = z^3 + z^2 Q[5, 2] - z Q[5, 2] Q[8, 1] + Q[4, 3] Q[5, 2] Q[8, 1]$$

1 connected components

$$\text{Jacobian} = \left\{ \{0, Q[5, 2], 0\}, \{Q[8, 1], -Q[5, 2], Q[4, 3]\}, \{-Q[8, 1], 0, 0\} \right\}$$

Stability conditions

1

$$Q[8, 1] < 0 \ \&\& \ Q[5, 2] > 0 \ \&\& \ -Q[5, 2] < Q[4, 3] < 0$$

2

$$Q[8, 1] < 0 \ \&\& \ Q[4, 3] < 0 \ \&\& \ Q[5, 2] > -Q[4, 3]$$

3

$$Q[5, 2] > 0 \ \&\& \ -Q[5, 2] < Q[4, 3] < 0 \ \&\& \ Q[8, 1] < 0$$

#### #15

Triplet: Q1z Q7y Q8x

Eigenvalues:

$$\left\{ \begin{array}{l} \text{Root}\left[Q[1, 3] Q[7, 2] Q[8, 1] + (-4 Q[1, 3] Q[7, 2] - Q[1, 3] Q[8, 1]) \#1 + Q[7, 2] \#1^2 + \#1^3 \ \& , 1\right], \\ \text{Root}\left[Q[1, 3] Q[7, 2] Q[8, 1] + (-4 Q[1, 3] Q[7, 2] - Q[1, 3] Q[8, 1]) \#1 + Q[7, 2] \#1^2 + \#1^3 \ \& , 2\right], \\ \text{Root}\left[Q[1, 3] Q[7, 2] Q[8, 1] + (-4 Q[1, 3] Q[7, 2] - Q[1, 3] Q[8, 1]) \#1 + Q[7, 2] \#1^2 + \#1^3 \ \& , 3\right] \end{array} \right\}$$

$$\text{Char Polyn} = z^3 + z^2 Q[7, 2] - 4 z Q[1, 3] Q[7, 2] - z Q[1, 3] Q[8, 1] + Q[1, 3] Q[7, 2] Q[8, 1]$$

1 connected components

$$\text{Jacobian} = \left\{ \{0, 0, -Q[1, 3]\}, \{Q[8, 1], -Q[7, 2], 2 Q[1, 3]\}, \{-Q[8, 1], 2 Q[7, 2], 0\} \right\}$$

Stability conditions

1

$$Q[8, 1] < 0 \ \&\& \ Q[7, 2] > -\frac{1}{2} Q[8, 1] \ \&\& \ Q[1, 3] < 0$$

2

$$Q[8, 1] < 0 \ \&\& \ Q[1, 3] < 0 \ \&\& \ Q[7, 2] > -\frac{1}{2} Q[8, 1]$$

3

$$Q[7, 2] > 0 \ \&\& \ Q[1, 3] < 0 \ \&\& \ -2 Q[7, 2] < Q[8, 1] < 0$$

## #16

Triplet: Q5z Q7y Q8x

Eigenvalues:

$$\left\{ \begin{aligned} &\text{Root}\left[-Q[5, 3] Q[7, 2] Q[8, 1] + (2 Q[5, 3] Q[7, 2] + Q[5, 3] Q[8, 1]) \#1 + Q[7, 2] \#1^2 + \#1^3 \ \&, 1\right], \\ &\text{Root}\left[-Q[5, 3] Q[7, 2] Q[8, 1] + (2 Q[5, 3] Q[7, 2] + Q[5, 3] Q[8, 1]) \#1 + Q[7, 2] \#1^2 + \#1^3 \ \&, 2\right], \\ &\text{Root}\left[-Q[5, 3] Q[7, 2] Q[8, 1] + (2 Q[5, 3] Q[7, 2] + Q[5, 3] Q[8, 1]) \#1 + Q[7, 2] \#1^2 + \#1^3 \ \&, 3\right] \end{aligned} \right\}$$

Char Polyn= $z^3 + z^2 Q[7, 2] + 2 z Q[5, 3] Q[7, 2] + z Q[5, 3] Q[8, 1] - Q[5, 3] Q[7, 2] Q[8, 1]$ 

1 connected components

Jacobian={{0, 0, Q[5, 3]}, {Q[8, 1], -Q[7, 2], -Q[5, 3]}, {-Q[8, 1], 2 Q[7, 2], 0}}

Stability conditions

1

$$Q[8, 1] < 0 \ \&\& \ Q[7, 2] > -Q[8, 1] \ \&\& \ Q[5, 3] > 0$$

2

$$Q[8, 1] < 0 \ \&\& \ Q[5, 3] > 0 \ \&\& \ Q[7, 2] > -Q[8, 1]$$

3

$$Q[7, 2] > 0 \ \&\& \ Q[5, 3] > 0 \ \&\& \ -Q[7, 2] < Q[8, 1] < 0$$

## #17

Triplet: Q1y Q2z Q8x

Eigenvalues:

$$\left\{ \begin{aligned} &\text{Root}\left[-2 Q[1, 2] Q[2, 3] Q[8, 1] + (Q[1, 2] Q[8, 1] + Q[2, 3] Q[8, 1]) \#1 - 2 Q[1, 2] \#1^2 + \#1^3 \ \&, 1\right], \\ &\text{Root}\left[-2 Q[1, 2] Q[2, 3] Q[8, 1] + (Q[1, 2] Q[8, 1] + Q[2, 3] Q[8, 1]) \#1 - 2 Q[1, 2] \#1^2 + \#1^3 \ \&, 2\right], \\ &\text{Root}\left[-2 Q[1, 2] Q[2, 3] Q[8, 1] + (Q[1, 2] Q[8, 1] + Q[2, 3] Q[8, 1]) \#1 - 2 Q[1, 2] \#1^2 + \#1^3 \ \&, 3\right] \end{aligned} \right\}$$

Char Polyn= $z^3 - 2 z^2 Q[1, 2] + z Q[1, 2] Q[8, 1] + z Q[2, 3] Q[8, 1] - 2 Q[1, 2] Q[2, 3] Q[8, 1]$ 

1 connected components

Jacobian={{0, -Q[1, 2], Q[2, 3]}, {Q[8, 1], 2 Q[1, 2], 0}, {-Q[8, 1], 0, 0}}

Stability conditions

1

$$Q[8, 1] < 0 \ \&\& \ Q[2, 3] < 0 \ \&\& \ Q[1, 2] < 0$$

2

$$Q[8, 1] < 0 \ \&\& \ Q[1, 2] < 0 \ \&\& \ Q[2, 3] < 0$$

3

$$Q[2, 3] < 0 \ \&\& \ Q[1, 2] < 0 \ \&\& \ Q[8, 1] < 0$$

The digraphs is a tree

## #18

Triplet: Q1y Q3z Q8x

Eigenvalues:  $\{ \text{Root}[Q[1, 2] Q[3, 3] Q[8, 1] + Q[1, 2] Q[8, 1] \#1 - 2 Q[1, 2] \#1^2 + \#1^3 \&, 1],$   
 $\text{Root}[Q[1, 2] Q[3, 3] Q[8, 1] + Q[1, 2] Q[8, 1] \#1 - 2 Q[1, 2] \#1^2 + \#1^3 \&, 2],$   
 $\text{Root}[Q[1, 2] Q[3, 3] Q[8, 1] + Q[1, 2] Q[8, 1] \#1 - 2 Q[1, 2] \#1^2 + \#1^3 \&, 3] \}$

Char Polyn= $z^3 - 2 z^2 Q[1, 2] + z Q[1, 2] Q[8, 1] + Q[1, 2] Q[3, 3] Q[8, 1]$

1 connected components

Jacobian= $\{ \{0, -Q[1, 2], 0\}, \{Q[8, 1], 2 Q[1, 2], -Q[3, 3]\}, \{-Q[8, 1], 0, 0\} \}$

Stability conditions

1

$$Q[8, 1] < 0 \&\& Q[3, 3] > 0 \&\& Q[1, 2] < -\frac{1}{2} Q[3, 3]$$

2

$$Q[8, 1] < 0 \&\& Q[1, 2] < 0 \&\& 0 < Q[3, 3] < -2 Q[1, 2]$$

3

$$Q[3, 3] > 0 \&\& Q[1, 2] < -\frac{1}{2} Q[3, 3] \&\& Q[8, 1] < 0$$

## #19

Triplet: Q1y Q4z Q8x

Eigenvalues:  $\{ \text{Root}[-Q[1, 2] Q[4, 3] Q[8, 1] + Q[1, 2] Q[8, 1] \#1 - 2 Q[1, 2] \#1^2 + \#1^3 \&, 1],$   
 $\text{Root}[-Q[1, 2] Q[4, 3] Q[8, 1] + Q[1, 2] Q[8, 1] \#1 - 2 Q[1, 2] \#1^2 + \#1^3 \&, 2],$   
 $\text{Root}[-Q[1, 2] Q[4, 3] Q[8, 1] + Q[1, 2] Q[8, 1] \#1 - 2 Q[1, 2] \#1^2 + \#1^3 \&, 3] \}$

Char Polyn= $z^3 - 2 z^2 Q[1, 2] + z Q[1, 2] Q[8, 1] - Q[1, 2] Q[4, 3] Q[8, 1]$

1 connected components

Jacobian= $\{ \{0, -Q[1, 2], 0\}, \{Q[8, 1], 2 Q[1, 2], Q[4, 3]\}, \{-Q[8, 1], 0, 0\} \}$

Stability conditions

1

$$Q[8, 1] < 0 \&\& Q[4, 3] < 0 \&\& Q[1, 2] < \frac{1}{2} Q[4, 3]$$

2

$$Q[8, 1] < 0 \&\& Q[1, 2] < 0 \&\& 2 Q[1, 2] < Q[4, 3] < 0$$

3

$$Q[4, 3] < 0 \&\& Q[1, 2] < \frac{1}{2} Q[4, 3] \&\& Q[8, 1] < 0$$

## #20

Triplet: Q1y Q5z Q8x

Eigenvalues:

$\{ \text{Root}[-Q[1, 2] Q[5, 3] Q[8, 1] + (Q[1, 2] Q[8, 1] + Q[5, 3] Q[8, 1]) \#1 - 2 Q[1, 2] \#1^2 + \#1^3 \&, 1],$   
 $\text{Root}[-Q[1, 2] Q[5, 3] Q[8, 1] + (Q[1, 2] Q[8, 1] + Q[5, 3] Q[8, 1]) \#1 - 2 Q[1, 2] \#1^2 + \#1^3 \&, 2],$   
 $\text{Root}[-Q[1, 2] Q[5, 3] Q[8, 1] + (Q[1, 2] Q[8, 1] + Q[5, 3] Q[8, 1]) \#1 - 2 Q[1, 2] \#1^2 + \#1^3 \&, 3] \}$

Char Polyn= $z^3 - 2 z^2 Q[1, 2] + z Q[1, 2] Q[8, 1] + z Q[5, 3] Q[8, 1] - Q[1, 2] Q[5, 3] Q[8, 1]$

1 connected components

Jacobian={{0, -Q[1, 2], Q[5, 3]}, {Q[8, 1], 2 Q[1, 2], -Q[5, 3]}, {-Q[8, 1], 0, 0}}

Stability conditions

1

$(Q[8, 1] < 0 \ \&\& \ Q[5, 3] < 0 \ \&\& \ Q[1, 2] < 0) \ || \ \left( Q[8, 1] > 0 \ \&\& \ Q[5, 3] > 0 \ \&\& \ -\frac{1}{2} Q[5, 3] < Q[1, 2] < 0 \right)$

2

$(Q[8, 1] < 0 \ \&\& \ Q[1, 2] < 0 \ \&\& \ Q[5, 3] < 0) \ || \ (Q[8, 1] > 0 \ \&\& \ Q[1, 2] < 0 \ \&\& \ Q[5, 3] > -2 Q[1, 2])$

3

$(Q[5, 3] < 0 \ \&\& \ Q[1, 2] < 0 \ \&\& \ Q[8, 1] < 0) \ || \ \left( Q[5, 3] > 0 \ \&\& \ -\frac{1}{2} Q[5, 3] < Q[1, 2] < 0 \ \&\& \ Q[8, 1] > 0 \right)$

## #21

Triplet: Q1y Q6z Q8x

Eigenvalues:

{Root[2 Q[1, 2] Q[6, 3] Q[8, 1] + (Q[1, 2] Q[8, 1] - Q[6, 3] Q[8, 1]) #1 - 2 Q[1, 2] #1<sup>2</sup> + #1<sup>3</sup> &, 1],  
Root[2 Q[1, 2] Q[6, 3] Q[8, 1] + (Q[1, 2] Q[8, 1] - Q[6, 3] Q[8, 1]) #1 - 2 Q[1, 2] #1<sup>2</sup> + #1<sup>3</sup> &, 2],  
Root[2 Q[1, 2] Q[6, 3] Q[8, 1] + (Q[1, 2] Q[8, 1] - Q[6, 3] Q[8, 1]) #1 - 2 Q[1, 2] #1<sup>2</sup> + #1<sup>3</sup> &, 3]}

Char Polyn= $z^3 - 2 z^2 Q[1, 2] + z Q[1, 2] Q[8, 1] - z Q[6, 3] Q[8, 1] + 2 Q[1, 2] Q[6, 3] Q[8, 1]$

1 connected components

Jacobian={{0, -Q[1, 2], -Q[6, 3]}, {Q[8, 1], 2 Q[1, 2], 0}, {-Q[8, 1], 0, 0}}

Stability conditions

1

$Q[8, 1] < 0 \ \&\& \ Q[6, 3] > 0 \ \&\& \ Q[1, 2] < 0$

2

$Q[8, 1] < 0 \ \&\& \ Q[1, 2] < 0 \ \&\& \ Q[6, 3] > 0$

3

$Q[6, 3] > 0 \ \&\& \ Q[1, 2] < 0 \ \&\& \ Q[8, 1] < 0$

The digraphs is a tree

## #22

Triplet: Q5y Q6z Q8x

Eigenvalues:

{Root[-Q[5, 2] Q[6, 3] Q[8, 1] + (-Q[5, 2] Q[8, 1] - Q[6, 3] Q[8, 1]) #1 + Q[5, 2] #1<sup>2</sup> + #1<sup>3</sup> &, 1],  
Root[-Q[5, 2] Q[6, 3] Q[8, 1] + (-Q[5, 2] Q[8, 1] - Q[6, 3] Q[8, 1]) #1 + Q[5, 2] #1<sup>2</sup> + #1<sup>3</sup> &, 2],  
Root[-Q[5, 2] Q[6, 3] Q[8, 1] + (-Q[5, 2] Q[8, 1] - Q[6, 3] Q[8, 1]) #1 + Q[5, 2] #1<sup>2</sup> + #1<sup>3</sup> &, 3]}

Char Polyn= $z^3 + z^2 Q[5, 2] - z Q[5, 2] Q[8, 1] - z Q[6, 3] Q[8, 1] - Q[5, 2] Q[6, 3] Q[8, 1]$

1 connected components

Jacobian={{0, Q[5, 2], -Q[6, 3]}, {Q[8, 1], -Q[5, 2], 0}, {-Q[8, 1], 0, 0}}

Stability conditions

1

$$Q[8, 1] < 0 \ \&\& \ Q[6, 3] > 0 \ \&\& \ Q[5, 2] > 0$$

2

$$Q[8, 1] < 0 \ \&\& \ Q[5, 2] > 0 \ \&\& \ Q[6, 3] > 0$$

3

$$Q[6, 3] > 0 \ \&\& \ Q[5, 2] > 0 \ \&\& \ Q[8, 1] < 0$$

The digraphs is a tree

### #23

Triplet: Q1y Q7z Q8x

Eigenvalues: {Root[-Q[1, 2] Q[7, 3] Q[8, 1] + (4 Q[1, 2] Q[7, 3] + Q[1, 2] Q[8, 1]) #1 + (-2 Q[1, 2] - 2 Q[7, 3]) #1<sup>2</sup> + #1<sup>3</sup> &, 1],  
 Root[-Q[1, 2] Q[7, 3] Q[8, 1] + (4 Q[1, 2] Q[7, 3] + Q[1, 2] Q[8, 1]) #1 + (-2 Q[1, 2] - 2 Q[7, 3]) #1<sup>2</sup> + #1<sup>3</sup> &, 2],  
 Root[-Q[1, 2] Q[7, 3] Q[8, 1] + (4 Q[1, 2] Q[7, 3] + Q[1, 2] Q[8, 1]) #1 + (-2 Q[1, 2] - 2 Q[7, 3]) #1<sup>2</sup> + #1<sup>3</sup> &, 3]}

Char Polyn=

$$z^3 - 2 z^2 Q[1, 2] - 2 z^2 Q[7, 3] + 4 z Q[1, 2] Q[7, 3] + z Q[1, 2] Q[8, 1] - Q[1, 2] Q[7, 3] Q[8, 1]$$

1 connected components

Jacobian={{0, -Q[1, 2], 0}, {Q[8, 1], 2 Q[1, 2], -Q[7, 3]}, {-Q[8, 1], 0, 2 Q[7, 3]}}

Stability conditions

1

$$(Q[8, 1] < 0 \ \&\& \ Q[7, 3] < 0 \ \&\& \ Q[1, 2] < 0) \ || \ \left( Q[8, 1] > 0 \ \&\& \ -\frac{1}{8} Q[8, 1] < Q[7, 3] < 0 \ \&\& \ 0 < Q[1, 2] < \frac{-8 Q[7, 3]^2 - Q[7, 3] Q[8, 1]}{8 Q[7, 3] + 2 Q[8, 1]} \right)$$

2

$$(Q[8, 1] < 0 \ \&\& \ Q[1, 2] < 0 \ \&\& \ Q[7, 3] < 0) \ || \ \left( Q[8, 1] > 0 \ \&\& \ 0 < Q[1, 2] < \frac{3}{8} Q[8, 1] - \frac{\sqrt{Q[8, 1]^2}}{2 \sqrt{2}} \ \&\& \ \frac{1}{16} (-8 Q[1, 2] - Q[8, 1]) - \frac{1}{16} \sqrt{64 Q[1, 2]^2 - 48 Q[1, 2] Q[8, 1] + Q[8, 1]^2} < Q[7, 3] < \frac{1}{16} (-8 Q[1, 2] - Q[8, 1]) + \frac{1}{16} \sqrt{64 Q[1, 2]^2 - 48 Q[1, 2] Q[8, 1] + Q[8, 1]^2} \right)$$

3

$$Q[7, 3] < 0 \ \&\& \ \left( (Q[1, 2] < 0 \ \&\& \ Q[8, 1] < 0) \ || \ \left( 0 < Q[1, 2] < -\frac{1}{2} Q[7, 3] \ \&\& \ Q[8, 1] > \frac{-8 Q[1, 2] Q[7, 3] - 8 Q[7, 3]^2}{2 Q[1, 2] + Q[7, 3]} \right) \right)$$

## #24

Triplet: Q2y Q7z Q8x

Eigenvalues:  $\{\text{Root}[Q[2, 2] Q[7, 3] Q[8, 1] - Q[2, 2] Q[8, 1] \#1 - 2 Q[7, 3] \#1^2 + \#1^3 \&, 1],$   
 $\text{Root}[Q[2, 2] Q[7, 3] Q[8, 1] - Q[2, 2] Q[8, 1] \#1 - 2 Q[7, 3] \#1^2 + \#1^3 \&, 2],$   
 $\text{Root}[Q[2, 2] Q[7, 3] Q[8, 1] - Q[2, 2] Q[8, 1] \#1 - 2 Q[7, 3] \#1^2 + \#1^3 \&, 3]\}$

Char Polyn= $z^3 - 2 z^2 Q[7, 3] - z Q[2, 2] Q[8, 1] + Q[2, 2] Q[7, 3] Q[8, 1]$ 

1 connected components

Jacobian= $\{\{0, Q[2, 2], 0\}, \{Q[8, 1], 0, -Q[7, 3]\}, \{-Q[8, 1], 0, 2 Q[7, 3]\}\}$ 

Stability conditions

1

 $(Q[8, 1] < 0 \&\& Q[7, 3] < 0 \&\& Q[2, 2] > 0) \mid\mid (Q[8, 1] > 0 \&\& Q[7, 3] < 0 \&\& Q[2, 2] < 0)$ 

2

 $(Q[8, 1] < 0 \&\& Q[2, 2] > 0 \&\& Q[7, 3] < 0) \mid\mid (Q[8, 1] > 0 \&\& Q[2, 2] < 0 \&\& Q[7, 3] < 0)$ 

3

 $Q[7, 3] < 0 \&\& ((Q[2, 2] < 0 \&\& Q[8, 1] > 0) \mid\mid (Q[2, 2] > 0 \&\& Q[8, 1] < 0))$ 

## #25

Triplet: Q5y Q7z Q8x

Eigenvalues:  $\{\text{Root}[Q[5, 2] Q[7, 3] Q[8, 1] +$   
 $(-2 Q[5, 2] Q[7, 3] - Q[5, 2] Q[8, 1]) \#1 + (Q[5, 2] - 2 Q[7, 3]) \#1^2 + \#1^3 \&, 1],$   
 $\text{Root}[Q[5, 2] Q[7, 3] Q[8, 1] + (-2 Q[5, 2] Q[7, 3] - Q[5, 2] Q[8, 1]) \#1 +$   
 $(Q[5, 2] - 2 Q[7, 3]) \#1^2 + \#1^3 \&, 2], \text{Root}[Q[5, 2] Q[7, 3] Q[8, 1] +$   
 $(-2 Q[5, 2] Q[7, 3] - Q[5, 2] Q[8, 1]) \#1 + (Q[5, 2] - 2 Q[7, 3]) \#1^2 + \#1^3 \&, 3]\}$

Char Polyn=

 $z^3 + z^2 Q[5, 2] - 2 z^2 Q[7, 3] - 2 z Q[5, 2] Q[7, 3] - z Q[5, 2] Q[8, 1] + Q[5, 2] Q[7, 3] Q[8, 1]$ 

1 connected components

Jacobian= $\{\{0, Q[5, 2], 0\}, \{Q[8, 1], -Q[5, 2], -Q[7, 3]\}, \{-Q[8, 1], 0, 2 Q[7, 3]\}\}$ 

Stability conditions

1

 $(Q[8, 1] < 0 \&\& Q[7, 3] < 0 \&\& Q[5, 2] > 0) \mid\mid$   
 $\left( Q[8, 1] > 0 \&\& -\frac{1}{4} Q[8, 1] < Q[7, 3] < 0 \&\& \frac{4 Q[7, 3]^2 + Q[7, 3] Q[8, 1]}{2 Q[7, 3] + Q[8, 1]} < Q[5, 2] < 0 \right)$ 

2

 $(Q[8, 1] < 0 \&\& Q[5, 2] > 0 \&\& Q[7, 3] < 0) \mid\mid$   
 $\left( Q[8, 1] > 0 \&\& -\frac{3}{2} Q[8, 1] + \sqrt{2} \sqrt{Q[8, 1]^2} < Q[5, 2] < 0 \&\&$   
 $\frac{1}{8} (2 Q[5, 2] - Q[8, 1]) - \frac{1}{8} \sqrt{4 Q[5, 2]^2 + 12 Q[5, 2] Q[8, 1] + Q[8, 1]^2} <$   
 $Q[7, 3] < \frac{1}{8} (2 Q[5, 2] - Q[8, 1]) + \frac{1}{8} \sqrt{4 Q[5, 2]^2 + 12 Q[5, 2] Q[8, 1] + Q[8, 1]^2} \right)$ 

3

$$Q[7, 3] < 0 \ \&\& \left( \left( Q[7, 3] < Q[5, 2] < 0 \ \&\& Q[8, 1] > \frac{-2 Q[5, 2] Q[7, 3] + 4 Q[7, 3]^2}{Q[5, 2] - Q[7, 3]} \right) \ || \right. \\ \left. (Q[5, 2] > 0 \ \&\& Q[8, 1] < 0) \right)$$

## #26

Triplet: Q6y Q7z Q8x

Eigenvalues: {Root[-Q[6, 2] Q[7, 3] Q[8, 1] + Q[6, 2] Q[8, 1] #1 - 2 Q[7, 3] #1<sup>2</sup> + #1<sup>3</sup> &, 1],  
 Root[-Q[6, 2] Q[7, 3] Q[8, 1] + Q[6, 2] Q[8, 1] #1 - 2 Q[7, 3] #1<sup>2</sup> + #1<sup>3</sup> &, 2],  
 Root[-Q[6, 2] Q[7, 3] Q[8, 1] + Q[6, 2] Q[8, 1] #1 - 2 Q[7, 3] #1<sup>2</sup> + #1<sup>3</sup> &, 3]}

Char Polyn=z<sup>3</sup> - 2 z<sup>2</sup> Q[7, 3] + z Q[6, 2] Q[8, 1] - Q[6, 2] Q[7, 3] Q[8, 1]

1 connected components

Jacobian={{0, -Q[6, 2], 0}, {Q[8, 1], 0, -Q[7, 3]}, {-Q[8, 1], 0, 2 Q[7, 3]}}

Stability conditions

1

(Q[8, 1] < 0 && Q[7, 3] < 0 && Q[6, 2] < 0) || (Q[8, 1] > 0 && Q[7, 3] < 0 && Q[6, 2] > 0)

2

(Q[8, 1] < 0 && Q[6, 2] < 0 && Q[7, 3] < 0) || (Q[8, 1] > 0 && Q[6, 2] > 0 && Q[7, 3] < 0)

3

Q[7, 3] < 0 && ((Q[6, 2] < 0 && Q[8, 1] < 0) || (Q[6, 2] > 0 && Q[8, 1] > 0))

## #27

Triplet: Q1z Q7y Q9x

Eigenvalues:

{Root[-Q[1, 3] Q[7, 2] Q[9, 1] + (-4 Q[1, 3] Q[7, 2] - Q[1, 3] Q[9, 1]) #1 + Q[7, 2] #1<sup>2</sup> + #1<sup>3</sup> &, 1],  
 Root[-Q[1, 3] Q[7, 2] Q[9, 1] + (-4 Q[1, 3] Q[7, 2] - Q[1, 3] Q[9, 1]) #1 + Q[7, 2] #1<sup>2</sup> + #1<sup>3</sup> &, 2],  
 Root[-Q[1, 3] Q[7, 2] Q[9, 1] + (-4 Q[1, 3] Q[7, 2] - Q[1, 3] Q[9, 1]) #1 + Q[7, 2] #1<sup>2</sup> + #1<sup>3</sup> &, 3]}

Char Polyn=z<sup>3</sup> + z<sup>2</sup> Q[7, 2] - 4 z Q[1, 3] Q[7, 2] - z Q[1, 3] Q[9, 1] - Q[1, 3] Q[7, 2] Q[9, 1]

1 connected components

Jacobian={{0, 0, -Q[1, 3]}, {0, -Q[7, 2], 2 Q[1, 3]}, {-Q[9, 1], 2 Q[7, 2], 0}}

Stability conditions

1

Q[9, 1] > 0 && Q[7, 2] > 0 && Q[1, 3] < 0

2

Q[9, 1] > 0 && Q[1, 3] < 0 && Q[7, 2] > 0

3

Q[7, 2] > 0 && Q[1, 3] < 0 && Q[9, 1] > 0

The digraphs is a tree

## #28

Triplet: Q5z Q7y Q9x

Eigenvalues:

$$\left\{ \begin{aligned} &\text{Root}\left[Q[5, 3] Q[7, 2] Q[9, 1] + (2 Q[5, 3] Q[7, 2] + Q[5, 3] Q[9, 1]) \#1 + Q[7, 2] \#1^2 + \#1^3 \ \&, 1\right], \\ &\text{Root}\left[Q[5, 3] Q[7, 2] Q[9, 1] + (2 Q[5, 3] Q[7, 2] + Q[5, 3] Q[9, 1]) \#1 + Q[7, 2] \#1^2 + \#1^3 \ \&, 2\right], \\ &\text{Root}\left[Q[5, 3] Q[7, 2] Q[9, 1] + (2 Q[5, 3] Q[7, 2] + Q[5, 3] Q[9, 1]) \#1 + Q[7, 2] \#1^2 + \#1^3 \ \&, 3\right] \end{aligned} \right\}$$

Char Polyn= $z^3 + z^2 Q[7, 2] + 2 z Q[5, 3] Q[7, 2] + z Q[5, 3] Q[9, 1] + Q[5, 3] Q[7, 2] Q[9, 1]$ 

1 connected components

Jacobian={{0, 0, Q[5, 3]}, {0, -Q[7, 2], -Q[5, 3]}, {-Q[9, 1], 2 Q[7, 2], 0}}

Stability conditions

1

 $Q[9, 1] > 0 \ \&\& \ Q[7, 2] > 0 \ \&\& \ Q[5, 3] > 0$ 

2

 $Q[9, 1] > 0 \ \&\& \ Q[5, 3] > 0 \ \&\& \ Q[7, 2] > 0$ 

3

 $Q[7, 2] > 0 \ \&\& \ Q[5, 3] > 0 \ \&\& \ Q[9, 1] > 0$ 

The digraphs is a tree

## #29

Triplet: Q1z Q8y Q9x

Eigenvalues:

$$\left\{ \begin{aligned} &\text{Root}\left[Q[1, 3] Q[8, 2] Q[9, 1] + (2 Q[1, 3] Q[8, 2] - Q[1, 3] Q[9, 1]) \#1 - Q[8, 2] \#1^2 + \#1^3 \ \&, 1\right], \\ &\text{Root}\left[Q[1, 3] Q[8, 2] Q[9, 1] + (2 Q[1, 3] Q[8, 2] - Q[1, 3] Q[9, 1]) \#1 - Q[8, 2] \#1^2 + \#1^3 \ \&, 2\right], \\ &\text{Root}\left[Q[1, 3] Q[8, 2] Q[9, 1] + (2 Q[1, 3] Q[8, 2] - Q[1, 3] Q[9, 1]) \#1 - Q[8, 2] \#1^2 + \#1^3 \ \&, 3\right] \end{aligned} \right\}$$

Char Polyn= $z^3 - z^2 Q[8, 2] + 2 z Q[1, 3] Q[8, 2] - z Q[1, 3] Q[9, 1] + Q[1, 3] Q[8, 2] Q[9, 1]$ 

1 connected components

Jacobian={{0, 0, -Q[1, 3]}, {0, Q[8, 2], 2 Q[1, 3]}, {-Q[9, 1], -Q[8, 2], 0}}

Stability conditions

1

 $Q[9, 1] > 0 \ \&\& \ Q[8, 2] < 0 \ \&\& \ Q[1, 3] < 0$ 

2

 $Q[9, 1] > 0 \ \&\& \ Q[1, 3] < 0 \ \&\& \ Q[8, 2] < 0$ 

3

 $Q[8, 2] < 0 \ \&\& \ Q[1, 3] < 0 \ \&\& \ Q[9, 1] > 0$ 

The digraphs is a tree

## #30



Triplet: Q5z Q8y Q9x

Eigenvalues:

$$\left\{ \begin{aligned} &\text{Root}\left[-Q[5, 3] Q[8, 2] Q[9, 1] + (-Q[5, 3] Q[8, 2] + Q[5, 3] Q[9, 1]) \#1 - Q[8, 2] \#1^2 + \#1^3 \ \&, 1\right], \\ &\text{Root}\left[-Q[5, 3] Q[8, 2] Q[9, 1] + (-Q[5, 3] Q[8, 2] + Q[5, 3] Q[9, 1]) \#1 - Q[8, 2] \#1^2 + \#1^3 \ \&, 2\right], \\ &\text{Root}\left[-Q[5, 3] Q[8, 2] Q[9, 1] + (-Q[5, 3] Q[8, 2] + Q[5, 3] Q[9, 1]) \#1 - Q[8, 2] \#1^2 + \#1^3 \ \&, 3\right] \end{aligned} \right\}$$

$$\text{Char Polyn} = z^3 - z^2 Q[8, 2] - z Q[5, 3] Q[8, 2] + z Q[5, 3] Q[9, 1] - Q[5, 3] Q[8, 2] Q[9, 1]$$

1 connected components

$$\text{Jacobian} = \{\{0, 0, Q[5, 3]\}, \{0, Q[8, 2], -Q[5, 3]\}, \{-Q[9, 1], -Q[8, 2], 0\}\}$$

Stability conditions

1

$$Q[9, 1] > 0 \ \&\& \ Q[8, 2] < 0 \ \&\& \ Q[5, 3] > 0$$

2

$$Q[9, 1] > 0 \ \&\& \ Q[5, 3] > 0 \ \&\& \ Q[8, 2] < 0$$

3

$$Q[8, 2] < 0 \ \&\& \ Q[5, 3] > 0 \ \&\& \ Q[9, 1] > 0$$

The digraphs is a tree

### #31

Triplet: Q1y Q5z Q9x

$$\text{Eigenvalues: } \left\{ \begin{aligned} &\text{Root}\left[-Q[1, 2] Q[5, 3] Q[9, 1] + Q[5, 3] Q[9, 1] \#1 - 2 Q[1, 2] \#1^2 + \#1^3 \ \&, 1\right], \\ &\text{Root}\left[-Q[1, 2] Q[5, 3] Q[9, 1] + Q[5, 3] Q[9, 1] \#1 - 2 Q[1, 2] \#1^2 + \#1^3 \ \&, 2\right], \\ &\text{Root}\left[-Q[1, 2] Q[5, 3] Q[9, 1] + Q[5, 3] Q[9, 1] \#1 - 2 Q[1, 2] \#1^2 + \#1^3 \ \&, 3\right] \end{aligned} \right\}$$

$$\text{Char Polyn} = z^3 - 2 z^2 Q[1, 2] + z Q[5, 3] Q[9, 1] - Q[1, 2] Q[5, 3] Q[9, 1]$$

1 connected components

$$\text{Jacobian} = \{\{0, -Q[1, 2], Q[5, 3]\}, \{0, 2 Q[1, 2], -Q[5, 3]\}, \{-Q[9, 1], 0, 0\}\}$$

Stability conditions

1

$$(Q[9, 1] < 0 \ \&\& \ Q[5, 3] < 0 \ \&\& \ Q[1, 2] < 0) \ || \ (Q[9, 1] > 0 \ \&\& \ Q[5, 3] > 0 \ \&\& \ Q[1, 2] < 0)$$

2

$$(Q[9, 1] < 0 \ \&\& \ Q[1, 2] < 0 \ \&\& \ Q[5, 3] < 0) \ || \ (Q[9, 1] > 0 \ \&\& \ Q[1, 2] < 0 \ \&\& \ Q[5, 3] > 0)$$

3

$$(Q[5, 3] < 0 \ \&\& \ Q[1, 2] < 0 \ \&\& \ Q[9, 1] < 0) \ || \ (Q[5, 3] > 0 \ \&\& \ Q[1, 2] < 0 \ \&\& \ Q[9, 1] > 0)$$

### #32

Triplet: Q1y Q7z Q9x

Eigenvalues:

$$\left\{ \begin{aligned} &\text{Root}\left[Q[1, 2] Q[7, 3] Q[9, 1] + 4 Q[1, 2] Q[7, 3] \#1 + (-2 Q[1, 2] - 2 Q[7, 3]) \#1^2 + \#1^3 \ \&, 1\right], \\ &\text{Root}\left[Q[1, 2] Q[7, 3] Q[9, 1] + 4 Q[1, 2] Q[7, 3] \#1 + (-2 Q[1, 2] - 2 Q[7, 3]) \#1^2 + \#1^3 \ \&, 2\right], \\ &\text{Root}\left[Q[1, 2] Q[7, 3] Q[9, 1] + 4 Q[1, 2] Q[7, 3] \#1 + (-2 Q[1, 2] - 2 Q[7, 3]) \#1^2 + \#1^3 \ \&, 3\right] \end{aligned} \right\}$$

Char Polyn= $z^3 - 2 z^2 Q[1, 2] - 2 z^2 Q[7, 3] + 4 z Q[1, 2] Q[7, 3] + Q[1, 2] Q[7, 3] Q[9, 1]$

1 connected components

Jacobian= $\{\{0, -Q[1, 2], 0\}, \{0, 2 Q[1, 2], -Q[7, 3]\}, \{-Q[9, 1], 0, 2 Q[7, 3]\}\}$

Stability conditions

1

$$Q[9, 1] > 0 \ \&\& \left( \left( Q[7, 3] \leq -\frac{1}{8} Q[9, 1] \ \&\& \ Q[1, 2] < 0 \right) \ || \right. \\ \left. \left( -\frac{1}{8} Q[9, 1] < Q[7, 3] < 0 \ \&\& \ Q[1, 2] < \frac{1}{8} (-8 Q[7, 3] - Q[9, 1]) \right) \right)$$

2

$$Q[9, 1] > 0 \ \&\& \left( \left( Q[1, 2] \leq -\frac{1}{8} Q[9, 1] \ \&\& \ Q[7, 3] < 0 \right) \ || \right. \\ \left. \left( -\frac{1}{8} Q[9, 1] < Q[1, 2] < 0 \ \&\& \ Q[7, 3] < \frac{1}{8} (-8 Q[1, 2] - Q[9, 1]) \right) \right)$$

3

$$Q[7, 3] < 0 \ \&\& \ Q[1, 2] < 0 \ \&\& \ 0 < Q[9, 1] < -8 Q[1, 2] - 8 Q[7, 3]$$

### #33

Triplet: Q5y Q7z Q9x

Eigenvalues:

$$\left\{ \begin{array}{l} \text{Root}[-Q[5, 2] Q[7, 3] Q[9, 1] - 2 Q[5, 2] Q[7, 3] \#1 + (Q[5, 2] - 2 Q[7, 3]) \#1^2 + \#1^3 \ \&, 1], \\ \text{Root}[-Q[5, 2] Q[7, 3] Q[9, 1] - 2 Q[5, 2] Q[7, 3] \#1 + (Q[5, 2] - 2 Q[7, 3]) \#1^2 + \#1^3 \ \&, 2], \\ \text{Root}[-Q[5, 2] Q[7, 3] Q[9, 1] - 2 Q[5, 2] Q[7, 3] \#1 + (Q[5, 2] - 2 Q[7, 3]) \#1^2 + \#1^3 \ \&, 3] \end{array} \right\}$$

Char Polyn= $z^3 + z^2 Q[5, 2] - 2 z^2 Q[7, 3] - 2 z Q[5, 2] Q[7, 3] - Q[5, 2] Q[7, 3] Q[9, 1]$

1 connected components

Jacobian= $\{\{0, Q[5, 2], 0\}, \{0, -Q[5, 2], -Q[7, 3]\}, \{-Q[9, 1], 0, 2 Q[7, 3]\}\}$

Stability conditions

1

$$Q[9, 1] > 0 \ \&\& \left( \left( Q[7, 3] \leq -\frac{1}{4} Q[9, 1] \ \&\& \ Q[5, 2] > 0 \right) \ || \right. \\ \left. \left( -\frac{1}{4} Q[9, 1] < Q[7, 3] < 0 \ \&\& \ Q[5, 2] > \frac{1}{2} (4 Q[7, 3] + Q[9, 1]) \right) \right)$$

2

$$Q[9, 1] > 0 \ \&\& \left( \left( 0 < Q[5, 2] \leq \frac{1}{2} Q[9, 1] \ \&\& \ Q[7, 3] < \frac{1}{4} (2 Q[5, 2] - Q[9, 1]) \right) \ || \right. \\ \left. \left( Q[5, 2] > \frac{1}{2} Q[9, 1] \ \&\& \ Q[7, 3] < 0 \right) \right)$$

3

$$Q[7, 3] < 0 \ \&\& \ Q[5, 2] > 0 \ \&\& \ 0 < Q[9, 1] < 2 Q[5, 2] - 4 Q[7, 3]$$

### #34

Triplet: Q1y Q8z Q9x

Eigenvalues:

$$\left\{ \begin{aligned} &\text{Root}\left[-Q[1, 2] Q[8, 3] Q[9, 1] - 2 Q[1, 2] Q[8, 3] \#1 + (-2 Q[1, 2] + Q[8, 3]) \#1^2 + \#1^3 \& , 1\right], \\ &\text{Root}\left[-Q[1, 2] Q[8, 3] Q[9, 1] - 2 Q[1, 2] Q[8, 3] \#1 + (-2 Q[1, 2] + Q[8, 3]) \#1^2 + \#1^3 \& , 2\right], \\ &\text{Root}\left[-Q[1, 2] Q[8, 3] Q[9, 1] - 2 Q[1, 2] Q[8, 3] \#1 + (-2 Q[1, 2] + Q[8, 3]) \#1^2 + \#1^3 \& , 3\right] \end{aligned} \right\}$$

Char Polyn= $z^3 - 2 z^2 Q[1, 2] + z^2 Q[8, 3] - 2 z Q[1, 2] Q[8, 3] - Q[1, 2] Q[8, 3] Q[9, 1]$

1 connected components

Jacobian={{0, -Q[1, 2], 0}, {0, 2 Q[1, 2], Q[8, 3]}, {-Q[9, 1], 0, -Q[8, 3]}}

Stability conditions

1

$$Q[9, 1] > 0 \&\& \left( \left( 0 < Q[8, 3] \leq \frac{1}{2} Q[9, 1] \&\& Q[1, 2] < \frac{1}{4} (2 Q[8, 3] - Q[9, 1]) \right) \mid \mid \right. \\ \left. \left( Q[8, 3] > \frac{1}{2} Q[9, 1] \&\& Q[1, 2] < 0 \right) \right)$$

2

$$Q[9, 1] > 0 \&\& \left( \left( Q[1, 2] \leq -\frac{1}{4} Q[9, 1] \&\& Q[8, 3] > 0 \right) \mid \mid \right. \\ \left. \left( -\frac{1}{4} Q[9, 1] < Q[1, 2] < 0 \&\& Q[8, 3] > \frac{1}{2} (4 Q[1, 2] + Q[9, 1]) \right) \right)$$

3

$$Q[8, 3] > 0 \&\& Q[1, 2] < 0 \&\& 0 < Q[9, 1] < -4 Q[1, 2] + 2 Q[8, 3]$$

### #35

Triplet: Q5y Q8z Q9x

Eigenvalues:

$$\left\{ \begin{aligned} &\text{Root}\left[Q[5, 2] Q[8, 3] Q[9, 1] + Q[5, 2] Q[8, 3] \#1 + (Q[5, 2] + Q[8, 3]) \#1^2 + \#1^3 \& , 1\right], \\ &\text{Root}\left[Q[5, 2] Q[8, 3] Q[9, 1] + Q[5, 2] Q[8, 3] \#1 + (Q[5, 2] + Q[8, 3]) \#1^2 + \#1^3 \& , 2\right], \\ &\text{Root}\left[Q[5, 2] Q[8, 3] Q[9, 1] + Q[5, 2] Q[8, 3] \#1 + (Q[5, 2] + Q[8, 3]) \#1^2 + \#1^3 \& , 3\right] \end{aligned} \right\}$$

Char Polyn= $z^3 + z^2 Q[5, 2] + z^2 Q[8, 3] + z Q[5, 2] Q[8, 3] + Q[5, 2] Q[8, 3] Q[9, 1]$

1 connected components

Jacobian={{0, Q[5, 2], 0}, {0, -Q[5, 2], Q[8, 3]}, {-Q[9, 1], 0, -Q[8, 3]}}

Stability conditions

1

$$Q[9, 1] > 0 \&\& \left( (0 < Q[8, 3] \leq Q[9, 1] \&\& Q[5, 2] > -Q[8, 3] + Q[9, 1]) \mid \mid (Q[8, 3] > Q[9, 1] \&\& Q[5, 2] > 0) \right)$$

2

$$Q[9, 1] > 0 \&\& \left( (0 < Q[5, 2] \leq Q[9, 1] \&\& Q[8, 3] > -Q[5, 2] + Q[9, 1]) \mid \mid (Q[5, 2] > Q[9, 1] \&\& Q[8, 3] > 0) \right)$$

3

$$Q[8, 3] > 0 \&\& Q[5, 2] > 0 \&\& 0 < Q[9, 1] < Q[5, 2] + Q[8, 3]$$

## #36

Triplet: Q1z Q7y Q10x

Eigenvalues: {Root[  
 $Q[1, 3] Q[7, 2] Q[10, 1] + (-4 Q[1, 3] Q[7, 2] + Q[1, 3] Q[10, 1]) \#1 + Q[7, 2] \#1^2 + \#1^3 \&, 1$ ],  
 Root[ $Q[1, 3] Q[7, 2] Q[10, 1] + (-4 Q[1, 3] Q[7, 2] + Q[1, 3] Q[10, 1]) \#1 + Q[7, 2] \#1^2 + \#1^3 \&, 2$ ], Root[  
 $Q[1, 3] Q[7, 2] Q[10, 1] + (-4 Q[1, 3] Q[7, 2] + Q[1, 3] Q[10, 1]) \#1 + Q[7, 2] \#1^2 + \#1^3 \&, 3$ ]}

Char Polyn= $z^3 + z^2 Q[7, 2] - 4 z Q[1, 3] Q[7, 2] + z Q[1, 3] Q[10, 1] + Q[1, 3] Q[7, 2] Q[10, 1]$ 

1 connected components

Jacobian={{0, 0, -Q[1, 3]}, {0, -Q[7, 2], 2 Q[1, 3]}, {Q[10, 1], 2 Q[7, 2], 0}}

Stability conditions

1

 $Q[10, 1] < 0 \&\& Q[7, 2] > 0 \&\& Q[1, 3] < 0$ 

2

 $Q[10, 1] < 0 \&\& Q[1, 3] < 0 \&\& Q[7, 2] > 0$ 

3

 $Q[7, 2] > 0 \&\& Q[1, 3] < 0 \&\& Q[10, 1] < 0$ 

The digraphs is a tree

## #37

Triplet: Q5z Q7y Q10x

Eigenvalues: {Root[  
 $-Q[5, 3] Q[7, 2] Q[10, 1] + (2 Q[5, 3] Q[7, 2] - Q[5, 3] Q[10, 1]) \#1 + Q[7, 2] \#1^2 + \#1^3 \&, 1$ ],  
 Root[ $-Q[5, 3] Q[7, 2] Q[10, 1] + (2 Q[5, 3] Q[7, 2] - Q[5, 3] Q[10, 1]) \#1 + Q[7, 2] \#1^2 + \#1^3 \&, 2$ ], Root[  
 $-Q[5, 3] Q[7, 2] Q[10, 1] + (2 Q[5, 3] Q[7, 2] - Q[5, 3] Q[10, 1]) \#1 + Q[7, 2] \#1^2 + \#1^3 \&, 3$ ]}

Char Polyn= $z^3 + z^2 Q[7, 2] + 2 z Q[5, 3] Q[7, 2] - z Q[5, 3] Q[10, 1] - Q[5, 3] Q[7, 2] Q[10, 1]$ 

1 connected components

Jacobian={{0, 0, Q[5, 3]}, {0, -Q[7, 2], -Q[5, 3]}, {Q[10, 1], 2 Q[7, 2], 0}}

Stability conditions

1

 $Q[10, 1] < 0 \&\& Q[7, 2] > 0 \&\& Q[5, 3] > 0$ 

2

 $Q[10, 1] < 0 \&\& Q[5, 3] > 0 \&\& Q[7, 2] > 0$ 

3

 $Q[7, 2] > 0 \&\& Q[5, 3] > 0 \&\& Q[10, 1] < 0$ 

The digraphs is a tree

## #38

Triplet: Q1z Q8y Q10x

Eigenvalues: {Root[  
 $-Q[1, 3] Q[8, 2] Q[10, 1] + (2 Q[1, 3] Q[8, 2] + Q[1, 3] Q[10, 1]) \#1 - Q[8, 2] \#1^2 + \#1^3 \&, 1]$ ,  
 Root[ $-Q[1, 3] Q[8, 2] Q[10, 1] + (2 Q[1, 3] Q[8, 2] + Q[1, 3] Q[10, 1]) \#1 - Q[8, 2] \#1^2 + \#1^3 \&, 2]$ , Root[  
 $-Q[1, 3] Q[8, 2] Q[10, 1] + (2 Q[1, 3] Q[8, 2] + Q[1, 3] Q[10, 1]) \#1 - Q[8, 2] \#1^2 + \#1^3 \&, 3]$ }

Char Polyn= $z^3 - z^2 Q[8, 2] + 2 z Q[1, 3] Q[8, 2] + z Q[1, 3] Q[10, 1] - Q[1, 3] Q[8, 2] Q[10, 1]$ 

1 connected components

Jacobian={{0, 0, -Q[1, 3]}, {0, Q[8, 2], 2 Q[1, 3]}, {Q[10, 1], -Q[8, 2], 0}}

Stability conditions

1

 $Q[10, 1] < 0 \&\& Q[8, 2] < 0 \&\& Q[1, 3] < 0$ 

2

 $Q[10, 1] < 0 \&\& Q[1, 3] < 0 \&\& Q[8, 2] < 0$ 

3

 $Q[8, 2] < 0 \&\& Q[1, 3] < 0 \&\& Q[10, 1] < 0$ 

The digraphs is a tree

## #39

Triplet: Q5z Q8y Q10x

Eigenvalues:  
 {Root[ $Q[5, 3] Q[8, 2] Q[10, 1] + (-Q[5, 3] Q[8, 2] - Q[5, 3] Q[10, 1]) \#1 - Q[8, 2] \#1^2 + \#1^3 \&, 1]$ ,  
 Root[ $Q[5, 3] Q[8, 2] Q[10, 1] + (-Q[5, 3] Q[8, 2] - Q[5, 3] Q[10, 1]) \#1 - Q[8, 2] \#1^2 + \#1^3 \&, 2]$ ,  
 Root[ $Q[5, 3] Q[8, 2] Q[10, 1] + (-Q[5, 3] Q[8, 2] - Q[5, 3] Q[10, 1]) \#1 - Q[8, 2] \#1^2 + \#1^3 \&, 3]$ }

Char Polyn= $z^3 - z^2 Q[8, 2] - z Q[5, 3] Q[8, 2] - z Q[5, 3] Q[10, 1] + Q[5, 3] Q[8, 2] Q[10, 1]$ 

1 connected components

Jacobian={{0, 0, Q[5, 3]}, {0, Q[8, 2], -Q[5, 3]}, {Q[10, 1], -Q[8, 2], 0}}

Stability conditions

1

 $Q[10, 1] < 0 \&\& Q[8, 2] < 0 \&\& Q[5, 3] > 0$ 

2

 $Q[10, 1] < 0 \&\& Q[5, 3] > 0 \&\& Q[8, 2] < 0$ 

3

 $Q[8, 2] < 0 \&\& Q[5, 3] > 0 \&\& Q[10, 1] < 0$ 

The digraphs is a tree

## #40

Triplet: Q1y Q5z Q10x

Eigenvalues:  $\{\text{Root}[Q[1, 2] Q[5, 3] Q[10, 1] - Q[5, 3] Q[10, 1] \#1 - 2 Q[1, 2] \#1^2 + \#1^3 \&, 1],$   
 $\text{Root}[Q[1, 2] Q[5, 3] Q[10, 1] - Q[5, 3] Q[10, 1] \#1 - 2 Q[1, 2] \#1^2 + \#1^3 \&, 2],$   
 $\text{Root}[Q[1, 2] Q[5, 3] Q[10, 1] - Q[5, 3] Q[10, 1] \#1 - 2 Q[1, 2] \#1^2 + \#1^3 \&, 3]\}$

Char Polyn= $z^3 - 2 z^2 Q[1, 2] - z Q[5, 3] Q[10, 1] + Q[1, 2] Q[5, 3] Q[10, 1]$

1 connected components

Jacobian= $\{\{0, -Q[1, 2], Q[5, 3]\}, \{0, 2 Q[1, 2], -Q[5, 3]\}, \{Q[10, 1], 0, 0\}\}$

Stability conditions

1

$(Q[10, 1] < 0 \&\& Q[5, 3] > 0 \&\& Q[1, 2] < 0) \mid\mid (Q[10, 1] > 0 \&\& Q[5, 3] < 0 \&\& Q[1, 2] < 0)$

2

$(Q[10, 1] < 0 \&\& Q[1, 2] < 0 \&\& Q[5, 3] > 0) \mid\mid (Q[10, 1] > 0 \&\& Q[1, 2] < 0 \&\& Q[5, 3] < 0)$

3

$(Q[5, 3] < 0 \&\& Q[1, 2] < 0 \&\& Q[10, 1] > 0) \mid\mid (Q[5, 3] > 0 \&\& Q[1, 2] < 0 \&\& Q[10, 1] < 0)$

#### #41

Triplet: Q1y Q7z Q10x

Eigenvalues:

$\{\text{Root}[-Q[1, 2] Q[7, 3] Q[10, 1] + 4 Q[1, 2] Q[7, 3] \#1 + (-2 Q[1, 2] - 2 Q[7, 3]) \#1^2 + \#1^3 \&, 1],$   
 $\text{Root}[-Q[1, 2] Q[7, 3] Q[10, 1] + 4 Q[1, 2] Q[7, 3] \#1 + (-2 Q[1, 2] - 2 Q[7, 3]) \#1^2 + \#1^3 \&, 2],$   
 $\text{Root}[-Q[1, 2] Q[7, 3] Q[10, 1] + 4 Q[1, 2] Q[7, 3] \#1 + (-2 Q[1, 2] - 2 Q[7, 3]) \#1^2 + \#1^3 \&, 3]\}$

Char Polyn= $z^3 - 2 z^2 Q[1, 2] - 2 z^2 Q[7, 3] + 4 z Q[1, 2] Q[7, 3] - Q[1, 2] Q[7, 3] Q[10, 1]$

1 connected components

Jacobian= $\{\{0, -Q[1, 2], 0\}, \{0, 2 Q[1, 2], -Q[7, 3]\}, \{Q[10, 1], 0, 2 Q[7, 3]\}\}$

Stability conditions

1

$Q[10, 1] < 0 \&\& \left( \left( Q[7, 3] \leq \frac{1}{8} Q[10, 1] \&\& Q[1, 2] < 0 \right) \mid\mid \left( \frac{1}{8} Q[10, 1] < Q[7, 3] < 0 \&\& Q[1, 2] < \frac{1}{8} (-8 Q[7, 3] + Q[10, 1]) \right) \right)$

2

$Q[10, 1] < 0 \&\& \left( \left( Q[1, 2] \leq \frac{1}{8} Q[10, 1] \&\& Q[7, 3] < 0 \right) \mid\mid \left( \frac{1}{8} Q[10, 1] < Q[1, 2] < 0 \&\& Q[7, 3] < \frac{1}{8} (-8 Q[1, 2] + Q[10, 1]) \right) \right)$

3

$Q[7, 3] < 0 \&\& Q[1, 2] < 0 \&\& 8 Q[1, 2] + 8 Q[7, 3] < Q[10, 1] < 0$

#### #42

Triplet: Q5y Q7z Q10x

Eigenvalues:

$$\left\{ \begin{array}{l} \text{Root}\left[Q[5, 2] Q[7, 3] Q[10, 1] - 2 Q[5, 2] Q[7, 3] \#1 + (Q[5, 2] - 2 Q[7, 3]) \#1^2 + \#1^3 \ \&, 1\right], \\ \text{Root}\left[Q[5, 2] Q[7, 3] Q[10, 1] - 2 Q[5, 2] Q[7, 3] \#1 + (Q[5, 2] - 2 Q[7, 3]) \#1^2 + \#1^3 \ \&, 2\right], \\ \text{Root}\left[Q[5, 2] Q[7, 3] Q[10, 1] - 2 Q[5, 2] Q[7, 3] \#1 + (Q[5, 2] - 2 Q[7, 3]) \#1^2 + \#1^3 \ \&, 3\right] \end{array} \right\}$$

$$\text{Char Polyn} = z^3 + z^2 Q[5, 2] - 2 z^2 Q[7, 3] - 2 z Q[5, 2] Q[7, 3] + Q[5, 2] Q[7, 3] Q[10, 1]$$

1 connected components

$$\text{Jacobian} = \{ \{0, Q[5, 2], 0\}, \{0, -Q[5, 2], -Q[7, 3]\}, \{Q[10, 1], 0, 2 Q[7, 3]\} \}$$

Stability conditions

1

$$Q[10, 1] < 0 \ \&\& \left( \left( Q[7, 3] \leq \frac{1}{4} Q[10, 1] \ \&\& Q[5, 2] > 0 \right) \ || \right. \\ \left. \left( \frac{1}{4} Q[10, 1] < Q[7, 3] < 0 \ \&\& Q[5, 2] > \frac{1}{2} (4 Q[7, 3] - Q[10, 1]) \right) \right)$$

2

$$Q[10, 1] < 0 \ \&\& \left( \left( 0 < Q[5, 2] \leq -\frac{1}{2} Q[10, 1] \ \&\& Q[7, 3] < \frac{1}{4} (2 Q[5, 2] + Q[10, 1]) \right) \ || \right. \\ \left. \left( Q[5, 2] > -\frac{1}{2} Q[10, 1] \ \&\& Q[7, 3] < 0 \right) \right)$$

3

$$Q[7, 3] < 0 \ \&\& Q[5, 2] > 0 \ \&\& -2 Q[5, 2] + 4 Q[7, 3] < Q[10, 1] < 0$$

### #43

Triplet: Q1y Q8z Q10x

Eigenvalues:

$$\left\{ \begin{array}{l} \text{Root}\left[Q[1, 2] Q[8, 3] Q[10, 1] - 2 Q[1, 2] Q[8, 3] \#1 + (-2 Q[1, 2] + Q[8, 3]) \#1^2 + \#1^3 \ \&, 1\right], \\ \text{Root}\left[Q[1, 2] Q[8, 3] Q[10, 1] - 2 Q[1, 2] Q[8, 3] \#1 + (-2 Q[1, 2] + Q[8, 3]) \#1^2 + \#1^3 \ \&, 2\right], \\ \text{Root}\left[Q[1, 2] Q[8, 3] Q[10, 1] - 2 Q[1, 2] Q[8, 3] \#1 + (-2 Q[1, 2] + Q[8, 3]) \#1^2 + \#1^3 \ \&, 3\right] \end{array} \right\}$$

$$\text{Char Polyn} = z^3 - 2 z^2 Q[1, 2] + z^2 Q[8, 3] - 2 z Q[1, 2] Q[8, 3] + Q[1, 2] Q[8, 3] Q[10, 1]$$

1 connected components

$$\text{Jacobian} = \{ \{0, -Q[1, 2], 0\}, \{0, 2 Q[1, 2], Q[8, 3]\}, \{Q[10, 1], 0, -Q[8, 3]\} \}$$

Stability conditions

1

$$Q[10, 1] < 0 \ \&\& \left( \left( 0 < Q[8, 3] \leq -\frac{1}{2} Q[10, 1] \ \&\& Q[1, 2] < \frac{1}{4} (2 Q[8, 3] + Q[10, 1]) \right) \ || \right. \\ \left. \left( Q[8, 3] > -\frac{1}{2} Q[10, 1] \ \&\& Q[1, 2] < 0 \right) \right)$$

2

$$Q[10, 1] < 0 \ \&\& \left( \left( Q[1, 2] \leq \frac{1}{4} Q[10, 1] \ \&\& Q[8, 3] > 0 \right) \ || \right. \\ \left. \left( \frac{1}{4} Q[10, 1] < Q[1, 2] < 0 \ \&\& Q[8, 3] > \frac{1}{2} (4 Q[1, 2] - Q[10, 1]) \right) \right)$$

3

$$Q[8, 3] > 0 \ \&\& \ Q[1, 2] < 0 \ \&\& \ 4 Q[1, 2] - 2 Q[8, 3] < Q[10, 1] < 0$$

#### #44

Triplet: Q5y Q8z Q10x

Eigenvalues:

$$\left\{ \begin{aligned} &\text{Root}[-Q[5, 2] Q[8, 3] Q[10, 1] + Q[5, 2] Q[8, 3] \#1 + (Q[5, 2] + Q[8, 3]) \#1^2 + \#1^3 \ \&, 1], \\ &\text{Root}[-Q[5, 2] Q[8, 3] Q[10, 1] + Q[5, 2] Q[8, 3] \#1 + (Q[5, 2] + Q[8, 3]) \#1^2 + \#1^3 \ \&, 2], \\ &\text{Root}[-Q[5, 2] Q[8, 3] Q[10, 1] + Q[5, 2] Q[8, 3] \#1 + (Q[5, 2] + Q[8, 3]) \#1^2 + \#1^3 \ \&, 3] \end{aligned} \right\}$$

$$\text{Char Polyn} = z^3 + z^2 Q[5, 2] + z^2 Q[8, 3] + z Q[5, 2] Q[8, 3] - Q[5, 2] Q[8, 3] Q[10, 1]$$

1 connected components

$$\text{Jacobian} = \{ \{0, Q[5, 2], 0\}, \{0, -Q[5, 2], Q[8, 3]\}, \{Q[10, 1], 0, -Q[8, 3]\} \}$$

Stability conditions

1

$$Q[10, 1] < 0 \ \&\& \ ((0 < Q[8, 3] \leq -Q[10, 1] \ \&\& \ Q[5, 2] > -Q[8, 3] - Q[10, 1]) \ || \ (Q[8, 3] > -Q[10, 1] \ \&\& \ Q[5, 2] > 0))$$

2

$$Q[10, 1] < 0 \ \&\& \ ((0 < Q[5, 2] \leq -Q[10, 1] \ \&\& \ Q[8, 3] > -Q[5, 2] - Q[10, 1]) \ || \ (Q[5, 2] > -Q[10, 1] \ \&\& \ Q[8, 3] > 0))$$

3

$$Q[8, 3] > 0 \ \&\& \ Q[5, 2] > 0 \ \&\& \ -Q[5, 2] - Q[8, 3] < Q[10, 1] < 0$$

#### #45

Triplet: Q1z Q3x Q7y

$$\text{Eigenvalues: } \left\{ \begin{aligned} &\text{Root}[-2 Q[1, 3] Q[3, 1] Q[7, 2] - 4 Q[1, 3] Q[7, 2] \#1 + Q[7, 2] \#1^2 + \#1^3 \ \&, 1], \\ &\text{Root}[-2 Q[1, 3] Q[3, 1] Q[7, 2] - 4 Q[1, 3] Q[7, 2] \#1 + Q[7, 2] \#1^2 + \#1^3 \ \&, 2], \\ &\text{Root}[-2 Q[1, 3] Q[3, 1] Q[7, 2] - 4 Q[1, 3] Q[7, 2] \#1 + Q[7, 2] \#1^2 + \#1^3 \ \&, 3] \end{aligned} \right\}$$

$$\text{Char Polyn} = z^3 + z^2 Q[7, 2] - 4 z Q[1, 3] Q[7, 2] - 2 Q[1, 3] Q[3, 1] Q[7, 2]$$

1 connected components

$$\text{Jacobian} = \{ \{0, 0, -Q[1, 3]\}, \{-Q[3, 1], -Q[7, 2], 2 Q[1, 3]\}, \{0, 2 Q[7, 2], 0\} \}$$

Stability conditions

1

$$Q[7, 2] > 0 \ \&\& \ 0 < Q[3, 1] < 2 Q[7, 2] \ \&\& \ Q[1, 3] < 0$$

2

$$Q[7, 2] > 0 \ \&\& \ Q[1, 3] < 0 \ \&\& \ 0 < Q[3, 1] < 2 Q[7, 2]$$

3

$$Q[3, 1] > 0 \ \&\& \ Q[1, 3] < 0 \ \&\& \ Q[7, 2] > \frac{1}{2} Q[3, 1]$$

#### #46



Triplet: Q1z Q4x Q7y

Eigenvalues:  $\{\text{Root}[2 Q[1, 3] Q[4, 1] Q[7, 2] - 4 Q[1, 3] Q[7, 2] \#1 + Q[7, 2] \#1^2 + \#1^3 \&, 1],$   
 $\text{Root}[2 Q[1, 3] Q[4, 1] Q[7, 2] - 4 Q[1, 3] Q[7, 2] \#1 + Q[7, 2] \#1^2 + \#1^3 \&, 2],$   
 $\text{Root}[2 Q[1, 3] Q[4, 1] Q[7, 2] - 4 Q[1, 3] Q[7, 2] \#1 + Q[7, 2] \#1^2 + \#1^3 \&, 3]\}$

Char Polyn= $z^3 + z^2 Q[7, 2] - 4 z Q[1, 3] Q[7, 2] + 2 Q[1, 3] Q[4, 1] Q[7, 2]$

1 connected components

Jacobian= $\{\{0, 0, -Q[1, 3]\}, \{Q[4, 1], -Q[7, 2], 2 Q[1, 3]\}, \{0, 2 Q[7, 2], 0\}\}$

Stability conditions

1

$Q[7, 2] > 0 \&\& -2 Q[7, 2] < Q[4, 1] < 0 \&\& Q[1, 3] < 0$

2

$Q[7, 2] > 0 \&\& Q[1, 3] < 0 \&\& -2 Q[7, 2] < Q[4, 1] < 0$

3

$Q[4, 1] < 0 \&\& Q[1, 3] < 0 \&\& Q[7, 2] > -\frac{1}{2} Q[4, 1]$

#47

Triplet: Q1z Q5x Q7y

Eigenvalues:  $\{\text{Root}[2 Q[1, 3] Q[5, 1] Q[7, 2] +$   
 $(-4 Q[1, 3] Q[7, 2] - Q[5, 1] Q[7, 2]) \#1 + (-Q[5, 1] + Q[7, 2]) \#1^2 + \#1^3 \&, 1],$   
 $\text{Root}[2 Q[1, 3] Q[5, 1] Q[7, 2] + (-4 Q[1, 3] Q[7, 2] - Q[5, 1] Q[7, 2]) \#1 +$   
 $(-Q[5, 1] + Q[7, 2]) \#1^2 + \#1^3 \&, 2], \text{Root}[2 Q[1, 3] Q[5, 1] Q[7, 2] +$   
 $(-4 Q[1, 3] Q[7, 2] - Q[5, 1] Q[7, 2]) \#1 + (-Q[5, 1] + Q[7, 2]) \#1^2 + \#1^3 \&, 3]\}$

Char Polyn=

$z^3 - z^2 Q[5, 1] + z^2 Q[7, 2] - 4 z Q[1, 3] Q[7, 2] - z Q[5, 1] Q[7, 2] + 2 Q[1, 3] Q[5, 1] Q[7, 2]$

1 connected components

Jacobian= $\{\{Q[5, 1], 0, -Q[1, 3]\}, \{-Q[5, 1], -Q[7, 2], 2 Q[1, 3]\}, \{0, 2 Q[7, 2], 0\}\}$

Stability conditions

1

$\left( Q[7, 2] < 0 \&\& Q[5, 1] < 2 Q[7, 2] \&\& Q[1, 3] > \frac{-Q[5, 1]^2 + Q[5, 1] Q[7, 2]}{2 Q[5, 1] - 4 Q[7, 2]} \right) \|\|$   
 $(Q[7, 2] > 0 \&\& Q[5, 1] < 0 \&\& Q[1, 3] < 0)$

2

$\left( Q[7, 2] < 0 \&\& Q[1, 3] > -\frac{3}{2} Q[7, 2] + \sqrt{2} \sqrt{Q[7, 2]^2} \&\&$   
 $\frac{1}{2} (-2 Q[1, 3] + Q[7, 2]) - \frac{1}{2} \sqrt{4 Q[1, 3]^2 + 12 Q[1, 3] Q[7, 2] + Q[7, 2]^2} < Q[5, 1] <$   
 $\frac{1}{2} (-2 Q[1, 3] + Q[7, 2]) + \frac{1}{2} \sqrt{4 Q[1, 3]^2 + 12 Q[1, 3] Q[7, 2] + Q[7, 2]^2} \right) \|\|$   
 $(Q[7, 2] > 0 \&\& Q[1, 3] < 0 \&\& Q[5, 1] < 0)$

3

$$Q[5, 1] < 0 \ \&\& \left( (Q[1, 3] < 0 \ \&\& Q[7, 2] > 0) \ || \right. \\ \left. \left( Q[1, 3] > -\frac{1}{2} Q[5, 1] \ \&\& \frac{2 Q[1, 3] Q[5, 1] + Q[5, 1]^2}{4 Q[1, 3] + Q[5, 1]} < Q[7, 2] < 0 \right) \right)$$

## #48

Triplet: Q2z Q5x Q7y

Eigenvalues:

$$\left\{ \begin{array}{l} \text{Root}\left[2 Q[2, 3] Q[5, 1] Q[7, 2] - Q[5, 1] Q[7, 2] \#1 + (-Q[5, 1] + Q[7, 2]) \#1^2 + \#1^3 \ \&, 1\right], \\ \text{Root}\left[2 Q[2, 3] Q[5, 1] Q[7, 2] - Q[5, 1] Q[7, 2] \#1 + (-Q[5, 1] + Q[7, 2]) \#1^2 + \#1^3 \ \&, 2\right], \\ \text{Root}\left[2 Q[2, 3] Q[5, 1] Q[7, 2] - Q[5, 1] Q[7, 2] \#1 + (-Q[5, 1] + Q[7, 2]) \#1^2 + \#1^3 \ \&, 3\right] \end{array} \right\}$$

Char Polyn= $z^3 - z^2 Q[5, 1] + z^2 Q[7, 2] - z Q[5, 1] Q[7, 2] + 2 Q[2, 3] Q[5, 1] Q[7, 2]$ 

1 connected components

Jacobian={{Q[5, 1], 0, Q[2, 3]}, {-Q[5, 1], -Q[7, 2], 0}, {0, 2 Q[7, 2], 0}}

Stability conditions

1

$$Q[7, 2] > 0 \ \&\& Q[5, 1] < 0 \ \&\& \frac{1}{2} (Q[5, 1] - Q[7, 2]) < Q[2, 3] < 0$$

2

$$Q[7, 2] > 0 \ \&\& \left( \left( Q[2, 3] \leq -\frac{1}{2} Q[7, 2] \ \&\& Q[5, 1] < 2 Q[2, 3] + Q[7, 2] \right) \ || \right. \\ \left. \left( -\frac{1}{2} Q[7, 2] < Q[2, 3] < 0 \ \&\& Q[5, 1] < 0 \right) \right)$$

3

$$Q[5, 1] < 0 \ \&\& \left( \left( Q[2, 3] \leq \frac{1}{2} Q[5, 1] \ \&\& Q[7, 2] > -2 Q[2, 3] + Q[5, 1] \right) \ || \right. \\ \left. \left( \frac{1}{2} Q[5, 1] < Q[2, 3] < 0 \ \&\& Q[7, 2] > 0 \right) \right)$$

## #49

Triplet: Q1x Q2z Q7y

Eigenvalues:

$$\left\{ \begin{array}{l} \text{Root}\left[-4 Q[1, 1] Q[2, 3] Q[7, 2] + Q[1, 1] Q[7, 2] \#1 + (Q[1, 1] + Q[7, 2]) \#1^2 + \#1^3 \ \&, 1\right], \\ \text{Root}\left[-4 Q[1, 1] Q[2, 3] Q[7, 2] + Q[1, 1] Q[7, 2] \#1 + (Q[1, 1] + Q[7, 2]) \#1^2 + \#1^3 \ \&, 2\right], \\ \text{Root}\left[-4 Q[1, 1] Q[2, 3] Q[7, 2] + Q[1, 1] Q[7, 2] \#1 + (Q[1, 1] + Q[7, 2]) \#1^2 + \#1^3 \ \&, 3\right] \end{array} \right\}$$

Char Polyn= $z^3 + z^2 Q[1, 1] + z^2 Q[7, 2] + z Q[1, 1] Q[7, 2] - 4 Q[1, 1] Q[2, 3] Q[7, 2]$ 

1 connected components

Jacobian={{-Q[1, 1], 0, Q[2, 3]}, {2 Q[1, 1], -Q[7, 2], 0}, {0, 2 Q[7, 2], 0}}

Stability conditions

1

$$Q[7, 2] > 0 \ \&\& \left( \left( Q[2, 3] \leq -\frac{1}{4} Q[7, 2] \ \&\& \ Q[1, 1] > -4 Q[2, 3] - Q[7, 2] \right) \ || \right. \\ \left. \left( -\frac{1}{4} Q[7, 2] < Q[2, 3] < 0 \ \&\& \ Q[1, 1] > 0 \right) \right)$$

2

$$Q[7, 2] > 0 \ \&\& \ Q[1, 1] > 0 \ \&\& \ \frac{1}{4} (-Q[1, 1] - Q[7, 2]) < Q[2, 3] < 0$$

3

$$Q[2, 3] < 0 \ \&\& \ \left( (0 < Q[1, 1] \leq -4 Q[2, 3] \ \&\& \ Q[7, 2] > -Q[1, 1] - 4 Q[2, 3]) \ || \right. \\ \left. (Q[1, 1] > -4 Q[2, 3] \ \&\& \ Q[7, 2] > 0) \right)$$

**#50**

Triplet: Q1x Q5z Q7y

$$\text{Eigenvalues: } \{ \text{Root}[-2 Q[1, 1] Q[5, 3] Q[7, 2] + \\ (Q[1, 1] Q[7, 2] + 2 Q[5, 3] Q[7, 2]) \#1 + (Q[1, 1] + Q[7, 2]) \#1^2 + \#1^3 \ \&, 1], \\ \text{Root}[-2 Q[1, 1] Q[5, 3] Q[7, 2] + (Q[1, 1] Q[7, 2] + 2 Q[5, 3] Q[7, 2]) \#1 + \\ (Q[1, 1] + Q[7, 2]) \#1^2 + \#1^3 \ \&, 2], \text{Root}[-2 Q[1, 1] Q[5, 3] Q[7, 2] + \\ (Q[1, 1] Q[7, 2] + 2 Q[5, 3] Q[7, 2]) \#1 + (Q[1, 1] + Q[7, 2]) \#1^2 + \#1^3 \ \&, 3] \}$$

Char Polyn=

$$z^3 + z^2 Q[1, 1] + z^2 Q[7, 2] + z Q[1, 1] Q[7, 2] + 2 z Q[5, 3] Q[7, 2] - 2 Q[1, 1] Q[5, 3] Q[7, 2]$$

1 connected components

$$\text{Jacobian} = \{ \{-Q[1, 1], 0, Q[5, 3]\}, \{2 Q[1, 1], -Q[7, 2], -Q[5, 3]\}, \{0, 2 Q[7, 2], 0\} \}$$

Stability conditions

1

$$Q[7, 2] > 0 \ \&\& \ \left( \left( Q[5, 3] < 0 \ \&\& \ Q[1, 1] > \frac{1}{2} (-4 Q[5, 3] - Q[7, 2]) + \frac{1}{2} \sqrt{16 Q[5, 3]^2 + Q[7, 2]^2} \right) \ || \right. \\ \left. \left( Q[5, 3] > 0 \ \&\& \ \frac{1}{2} (-4 Q[5, 3] - Q[7, 2]) + \frac{1}{2} \sqrt{16 Q[5, 3]^2 + Q[7, 2]^2} < Q[1, 1] < 0 \right) \right)$$

2

$$Q[7, 2] > 0 \ \&\& \ \left( \left( -\frac{1}{2} Q[7, 2] < Q[1, 1] < 0 \ \&\& \ Q[5, 3] > \frac{-Q[1, 1]^2 - Q[1, 1] Q[7, 2]}{4 Q[1, 1] + 2 Q[7, 2]} \right) \ || \right. \\ \left. \left( Q[1, 1] > 0 \ \&\& \ \frac{-Q[1, 1]^2 - Q[1, 1] Q[7, 2]}{4 Q[1, 1] + 2 Q[7, 2]} < Q[5, 3] < 0 \right) \right)$$

3

$$\left( Q[5, 3] < 0 \ \&\& \ \left( \left( -2 Q[5, 3] < Q[1, 1] \leq -4 Q[5, 3] \ \&\& \ Q[7, 2] > \frac{-Q[1, 1]^2 - 4 Q[1, 1] Q[5, 3]}{Q[1, 1] + 2 Q[5, 3]} \right) \ || \right. \right. \\ \left. \left. (Q[1, 1] > -4 Q[5, 3] \ \&\& \ Q[7, 2] > 0) \right) \right) \ || \\ \left( Q[5, 3] > 0 \ \&\& \ -2 Q[5, 3] < Q[1, 1] < 0 \ \&\& \ Q[7, 2] > \frac{-Q[1, 1]^2 - 4 Q[1, 1] Q[5, 3]}{Q[1, 1] + 2 Q[5, 3]} \right)$$

**#51**

Triplet: Q3x Q5z Q7y

Eigenvalues:  $\left\{ \text{Root}\left[2 Q[3, 1] Q[5, 3] Q[7, 2] + 2 Q[5, 3] Q[7, 2] \#1 + Q[7, 2] \#1^2 + \#1^3 \ \&, 1\right], \right.$   
 $\text{Root}\left[2 Q[3, 1] Q[5, 3] Q[7, 2] + 2 Q[5, 3] Q[7, 2] \#1 + Q[7, 2] \#1^2 + \#1^3 \ \&, 2\right],$   
 $\left. \text{Root}\left[2 Q[3, 1] Q[5, 3] Q[7, 2] + 2 Q[5, 3] Q[7, 2] \#1 + Q[7, 2] \#1^2 + \#1^3 \ \&, 3\right] \right\}$

Char Polyn= $z^3 + z^2 Q[7, 2] + 2 z Q[5, 3] Q[7, 2] + 2 Q[3, 1] Q[5, 3] Q[7, 2]$

1 connected components

Jacobian= $\{\{0, 0, Q[5, 3]\}, \{-Q[3, 1], -Q[7, 2], -Q[5, 3]\}, \{0, 2 Q[7, 2], 0\}$

Stability conditions

1

$Q[7, 2] > 0 \ \&\& \ Q[5, 3] > 0 \ \&\& \ 0 < Q[3, 1] < Q[7, 2]$

2

$Q[7, 2] > 0 \ \&\& \ 0 < Q[3, 1] < Q[7, 2] \ \&\& \ Q[5, 3] > 0$

3

$Q[5, 3] > 0 \ \&\& \ Q[3, 1] > 0 \ \&\& \ Q[7, 2] > Q[3, 1]$

## #52

Triplet: Q4x Q5z Q7y

Eigenvalues:  $\left\{ \text{Root}\left[-2 Q[4, 1] Q[5, 3] Q[7, 2] + 2 Q[5, 3] Q[7, 2] \#1 + Q[7, 2] \#1^2 + \#1^3 \ \&, 1\right], \right.$   
 $\text{Root}\left[-2 Q[4, 1] Q[5, 3] Q[7, 2] + 2 Q[5, 3] Q[7, 2] \#1 + Q[7, 2] \#1^2 + \#1^3 \ \&, 2\right],$   
 $\left. \text{Root}\left[-2 Q[4, 1] Q[5, 3] Q[7, 2] + 2 Q[5, 3] Q[7, 2] \#1 + Q[7, 2] \#1^2 + \#1^3 \ \&, 3\right] \right\}$

Char Polyn= $z^3 + z^2 Q[7, 2] + 2 z Q[5, 3] Q[7, 2] - 2 Q[4, 1] Q[5, 3] Q[7, 2]$

1 connected components

Jacobian= $\{\{0, 0, Q[5, 3]\}, \{Q[4, 1], -Q[7, 2], -Q[5, 3]\}, \{0, 2 Q[7, 2], 0\}$

Stability conditions

1

$Q[7, 2] > 0 \ \&\& \ Q[5, 3] > 0 \ \&\& \ -Q[7, 2] < Q[4, 1] < 0$

2

$Q[7, 2] > 0 \ \&\& \ -Q[7, 2] < Q[4, 1] < 0 \ \&\& \ Q[5, 3] > 0$

3

$Q[5, 3] > 0 \ \&\& \ Q[4, 1] < 0 \ \&\& \ Q[7, 2] > -Q[4, 1]$

## #53

Triplet: Q1x Q6z Q7y

Eigenvalues:

$\left\{ \text{Root}\left[4 Q[1, 1] Q[6, 3] Q[7, 2] + Q[1, 1] Q[7, 2] \#1 + (Q[1, 1] + Q[7, 2]) \#1^2 + \#1^3 \ \&, 1\right], \right.$   
 $\text{Root}\left[4 Q[1, 1] Q[6, 3] Q[7, 2] + Q[1, 1] Q[7, 2] \#1 + (Q[1, 1] + Q[7, 2]) \#1^2 + \#1^3 \ \&, 2\right],$   
 $\left. \text{Root}\left[4 Q[1, 1] Q[6, 3] Q[7, 2] + Q[1, 1] Q[7, 2] \#1 + (Q[1, 1] + Q[7, 2]) \#1^2 + \#1^3 \ \&, 3\right] \right\}$

Char Polyn= $z^3 + z^2 Q[1, 1] + z^2 Q[7, 2] + z Q[1, 1] Q[7, 2] + 4 Q[1, 1] Q[6, 3] Q[7, 2]$

1 connected components

Jacobian={{-Q[1, 1], 0, -Q[6, 3]}, {2 Q[1, 1], -Q[7, 2], 0}, {0, 2 Q[7, 2], 0}}

Stability conditions

1

$$Q[7, 2] > 0 \ \&\& \left( \left( 0 < Q[6, 3] \leq \frac{1}{4} Q[7, 2] \ \&\& \ Q[1, 1] > 0 \right) \ || \ \left( Q[6, 3] > \frac{1}{4} Q[7, 2] \ \&\& \ Q[1, 1] > 4 Q[6, 3] - Q[7, 2] \right) \right)$$

2

$$Q[7, 2] > 0 \ \&\& \ Q[1, 1] > 0 \ \&\& \ 0 < Q[6, 3] < \frac{1}{4} (Q[1, 1] + Q[7, 2])$$

3

$$Q[6, 3] > 0 \ \&\& \ \left( (0 < Q[1, 1] \leq 4 Q[6, 3] \ \&\& \ Q[7, 2] > -Q[1, 1] + 4 Q[6, 3]) \ || \ (Q[1, 1] > 4 Q[6, 3] \ \&\& \ Q[7, 2] > 0) \right)$$

## #54

Triplet: Q5x Q6z Q7y

Eigenvalues:

$$\left\{ \text{Root}[-2 Q[5, 1] Q[6, 3] Q[7, 2] - Q[5, 1] Q[7, 2] \#1 + (-Q[5, 1] + Q[7, 2]) \#1^2 + \#1^3 \ \&, 1], \right. \\ \text{Root}[-2 Q[5, 1] Q[6, 3] Q[7, 2] - Q[5, 1] Q[7, 2] \#1 + (-Q[5, 1] + Q[7, 2]) \#1^2 + \#1^3 \ \&, 2], \\ \left. \text{Root}[-2 Q[5, 1] Q[6, 3] Q[7, 2] - Q[5, 1] Q[7, 2] \#1 + (-Q[5, 1] + Q[7, 2]) \#1^2 + \#1^3 \ \&, 3] \right\}$$

Char Polyn= $z^3 - z^2 Q[5, 1] + z^2 Q[7, 2] - z Q[5, 1] Q[7, 2] - 2 Q[5, 1] Q[6, 3] Q[7, 2]$

1 connected components

Jacobian={{Q[5, 1], 0, -Q[6, 3]}, {-Q[5, 1], -Q[7, 2], 0}, {0, 2 Q[7, 2], 0}}

Stability conditions

1

$$Q[7, 2] > 0 \ \&\& \ \left( \left( 0 < Q[6, 3] \leq \frac{1}{2} Q[7, 2] \ \&\& \ Q[5, 1] < 0 \right) \ || \ \left( Q[6, 3] > \frac{1}{2} Q[7, 2] \ \&\& \ Q[5, 1] < -2 Q[6, 3] + Q[7, 2] \right) \right)$$

2

$$Q[7, 2] > 0 \ \&\& \ Q[5, 1] < 0 \ \&\& \ 0 < Q[6, 3] < \frac{1}{2} (-Q[5, 1] + Q[7, 2])$$

3

$$Q[6, 3] > 0 \ \&\& \ \left( (Q[5, 1] \leq -2 Q[6, 3] \ \&\& \ Q[7, 2] > 0) \ || \ (-2 Q[6, 3] < Q[5, 1] < 0 \ \&\& \ Q[7, 2] > Q[5, 1] + 2 Q[6, 3]) \right)$$

## #55

Triplet: Q1z Q3x Q8y

$$\left\{ \text{Root}[Q[1, 3] Q[3, 1] Q[8, 2] + 2 Q[1, 3] Q[8, 2] \#1 - Q[8, 2] \#1^2 + \#1^3 \ \&, 1], \right. \\ \text{Root}[Q[1, 3] Q[3, 1] Q[8, 2] + 2 Q[1, 3] Q[8, 2] \#1 - Q[8, 2] \#1^2 + \#1^3 \ \&, 2], \\ \left. \text{Root}[Q[1, 3] Q[3, 1] Q[8, 2] + 2 Q[1, 3] Q[8, 2] \#1 - Q[8, 2] \#1^2 + \#1^3 \ \&, 3] \right\}$$

Char Polyn= $z^3 - z^2 Q[8, 2] + 2 z Q[1, 3] Q[8, 2] + Q[1, 3] Q[3, 1] Q[8, 2]$

1 connected components

Jacobian={{0, 0, -Q[1, 3]}, {-Q[3, 1], Q[8, 2], 2 Q[1, 3]}, {0, -Q[8, 2], 0}}

Stability conditions

1

$Q[8, 2] < 0 \ \&\& \ 0 < Q[3, 1] < -2 Q[8, 2] \ \&\& \ Q[1, 3] < 0$

2

$Q[8, 2] < 0 \ \&\& \ Q[1, 3] < 0 \ \&\& \ 0 < Q[3, 1] < -2 Q[8, 2]$

3

$Q[3, 1] > 0 \ \&\& \ Q[1, 3] < 0 \ \&\& \ Q[8, 2] < -\frac{1}{2} Q[3, 1]$

## #56

Triplet: Q1z Q4x Q8y

Eigenvalues: {Root[-Q[1, 3] Q[4, 1] Q[8, 2] + 2 Q[1, 3] Q[8, 2] #1 - Q[8, 2] #1<sup>2</sup> + #1<sup>3</sup> &, 1],  
Root[-Q[1, 3] Q[4, 1] Q[8, 2] + 2 Q[1, 3] Q[8, 2] #1 - Q[8, 2] #1<sup>2</sup> + #1<sup>3</sup> &, 2],  
Root[-Q[1, 3] Q[4, 1] Q[8, 2] + 2 Q[1, 3] Q[8, 2] #1 - Q[8, 2] #1<sup>2</sup> + #1<sup>3</sup> &, 3]}

Char Polyn= $z^3 - z^2 Q[8, 2] + 2 z Q[1, 3] Q[8, 2] - Q[1, 3] Q[4, 1] Q[8, 2]$

1 connected components

Jacobian={{0, 0, -Q[1, 3]}, {Q[4, 1], Q[8, 2], 2 Q[1, 3]}, {0, -Q[8, 2], 0}}

Stability conditions

1

$Q[8, 2] < 0 \ \&\& \ 2 Q[8, 2] < Q[4, 1] < 0 \ \&\& \ Q[1, 3] < 0$

2

$Q[8, 2] < 0 \ \&\& \ Q[1, 3] < 0 \ \&\& \ 2 Q[8, 2] < Q[4, 1] < 0$

3

$Q[4, 1] < 0 \ \&\& \ Q[1, 3] < 0 \ \&\& \ Q[8, 2] < \frac{1}{2} Q[4, 1]$

## #57

Triplet: Q1z Q5x Q8y

Eigenvalues: {Root[-Q[1, 3] Q[5, 1] Q[8, 2] +  
(2 Q[1, 3] Q[8, 2] + Q[5, 1] Q[8, 2]) #1 + (-Q[5, 1] - Q[8, 2]) #1<sup>2</sup> + #1<sup>3</sup> &, 1],  
Root[-Q[1, 3] Q[5, 1] Q[8, 2] + (2 Q[1, 3] Q[8, 2] + Q[5, 1] Q[8, 2]) #1 +  
(-Q[5, 1] - Q[8, 2]) #1<sup>2</sup> + #1<sup>3</sup> &, 2], Root[-Q[1, 3] Q[5, 1] Q[8, 2] +  
(2 Q[1, 3] Q[8, 2] + Q[5, 1] Q[8, 2]) #1 + (-Q[5, 1] - Q[8, 2]) #1<sup>2</sup> + #1<sup>3</sup> &, 3]}

Char Polyn=

$z^3 - z^2 Q[5, 1] - z^2 Q[8, 2] + 2 z Q[1, 3] Q[8, 2] + z Q[5, 1] Q[8, 2] - Q[1, 3] Q[5, 1] Q[8, 2]$

1 connected components

Jacobian={{Q[5, 1], 0, -Q[1, 3]}, {-Q[5, 1], Q[8, 2], 2 Q[1, 3]}, {0, -Q[8, 2], 0}}

Stability conditions

1

$$(Q[8, 2] < 0 \ \&\& \ Q[5, 1] < 0 \ \&\& \ Q[1, 3] < 0) \ || \ \left( Q[8, 2] > 0 \ \&\& \ Q[5, 1] < -2 Q[8, 2] \ \&\& \ Q[1, 3] > \frac{-Q[5, 1]^2 - Q[5, 1] Q[8, 2]}{Q[5, 1] + 2 Q[8, 2]} \right)$$

2

$$(Q[8, 2] < 0 \ \&\& \ Q[1, 3] < 0 \ \&\& \ Q[5, 1] < 0) \ || \ \left( Q[8, 2] > 0 \ \&\& \ Q[1, 3] > 3 Q[8, 2] + 2 \sqrt{2} \sqrt{Q[8, 2]^2} \ \&\& \ \frac{1}{2} (-Q[1, 3] - Q[8, 2]) - \frac{1}{2} \sqrt{Q[1, 3]^2 - 6 Q[1, 3] Q[8, 2] + Q[8, 2]^2} < Q[5, 1] < \frac{1}{2} (-Q[1, 3] - Q[8, 2]) + \frac{1}{2} \sqrt{Q[1, 3]^2 - 6 Q[1, 3] Q[8, 2] + Q[8, 2]^2} \right)$$

3

$$Q[5, 1] < 0 \ \&\& \ \left( (Q[1, 3] < 0 \ \&\& \ Q[8, 2] < 0) \ || \ \left( Q[1, 3] > -Q[5, 1] \ \&\& \ 0 < Q[8, 2] < \frac{-Q[1, 3] Q[5, 1] - Q[5, 1]^2}{2 Q[1, 3] + Q[5, 1]} \right) \right)$$

### #58

Triplet: Q2z Q5x Q8y

Eigenvalues:

$$\left\{ \text{Root}[-Q[2, 3] Q[5, 1] Q[8, 2] + Q[5, 1] Q[8, 2] \#1 + (-Q[5, 1] - Q[8, 2]) \#1^2 + \#1^3 \ \& \ 1], \right. \\ \left. \text{Root}[-Q[2, 3] Q[5, 1] Q[8, 2] + Q[5, 1] Q[8, 2] \#1 + (-Q[5, 1] - Q[8, 2]) \#1^2 + \#1^3 \ \& \ 2], \right. \\ \left. \text{Root}[-Q[2, 3] Q[5, 1] Q[8, 2] + Q[5, 1] Q[8, 2] \#1 + (-Q[5, 1] - Q[8, 2]) \#1^2 + \#1^3 \ \& \ 3] \right\}$$

$$\text{Char Polyn} = z^3 - z^2 Q[5, 1] - z^2 Q[8, 2] + z Q[5, 1] Q[8, 2] - Q[2, 3] Q[5, 1] Q[8, 2]$$

1 connected components

$$\text{Jacobian} = \{ \{Q[5, 1], 0, Q[2, 3]\}, \{-Q[5, 1], Q[8, 2], 0\}, \{0, -Q[8, 2], 0\} \}$$

Stability conditions

1

$$Q[8, 2] < 0 \ \&\& \ Q[5, 1] < 0 \ \&\& \ Q[5, 1] + Q[8, 2] < Q[2, 3] < 0$$

2

$$Q[8, 2] < 0 \ \&\& \ (Q[2, 3] \leq Q[8, 2] \ \&\& \ Q[5, 1] < Q[2, 3] - Q[8, 2]) \ || \ (Q[8, 2] < Q[2, 3] < 0 \ \&\& \ Q[5, 1] < 0)$$

3

$$Q[5, 1] < 0 \ \&\& \ (Q[2, 3] \leq Q[5, 1] \ \&\& \ Q[8, 2] < Q[2, 3] - Q[5, 1]) \ || \ (Q[5, 1] < Q[2, 3] < 0 \ \&\& \ Q[8, 2] < 0)$$

### #59

Triplet: Q1z Q7x Q8y

Eigenvalues:

$$\left\{ \text{Root}[-Q[1, 3] Q[7, 1] Q[8, 2] + (2 Q[1, 3] Q[7, 1] + 2 Q[1, 3] Q[8, 2]) \#1 - Q[8, 2] \#1^2 + \#1^3 \ \& \ 1], \right. \\ \left. \text{Root}[-Q[1, 3] Q[7, 1] Q[8, 2] + (2 Q[1, 3] Q[7, 1] + 2 Q[1, 3] Q[8, 2]) \#1 - Q[8, 2] \#1^2 + \#1^3 \ \& \ 2], \right. \\ \left. \text{Root}[-Q[1, 3] Q[7, 1] Q[8, 2] + (2 Q[1, 3] Q[7, 1] + 2 Q[1, 3] Q[8, 2]) \#1 - Q[8, 2] \#1^2 + \#1^3 \ \& \ 3] \right\}$$

Char Polyn= $z^3 + 2 z Q[1, 3] Q[7, 1] - z^2 Q[8, 2] + 2 z Q[1, 3] Q[8, 2] - Q[1, 3] Q[7, 1] Q[8, 2]$

1 connected components

Jacobian={{0, 0, -Q[1, 3]}, {-Q[7, 1], Q[8, 2], 2 Q[1, 3]}, {2 Q[7, 1], -Q[8, 2], 0}}

Stability conditions

1

$Q[8, 2] < 0 \ \&\& \ ((Q[7, 1] < 0 \ \&\& \ Q[1, 3] < 0) \ || \ (Q[7, 1] > -2 Q[8, 2] \ \&\& \ Q[1, 3] > 0))$

2

$Q[8, 2] < 0 \ \&\& \ ((Q[1, 3] < 0 \ \&\& \ Q[7, 1] < 0) \ || \ (Q[1, 3] > 0 \ \&\& \ Q[7, 1] > -2 Q[8, 2]))$

3

$(Q[7, 1] < 0 \ \&\& \ Q[1, 3] < 0 \ \&\& \ Q[8, 2] < 0) \ || \ \left( Q[7, 1] > 0 \ \&\& \ Q[1, 3] > 0 \ \&\& \ -\frac{1}{2} Q[7, 1] < Q[8, 2] < 0 \right)$

## #60

Triplet: Q2z Q7x Q8y

Eigenvalues: {Root[Q[2, 3] Q[7, 1] Q[8, 2] - 2 Q[2, 3] Q[7, 1] #1 - Q[8, 2] #1<sup>2</sup> + #1<sup>3</sup> &, 1],  
Root[Q[2, 3] Q[7, 1] Q[8, 2] - 2 Q[2, 3] Q[7, 1] #1 - Q[8, 2] #1<sup>2</sup> + #1<sup>3</sup> &, 2],  
Root[Q[2, 3] Q[7, 1] Q[8, 2] - 2 Q[2, 3] Q[7, 1] #1 - Q[8, 2] #1<sup>2</sup> + #1<sup>3</sup> &, 3]}

Char Polyn= $z^3 - 2 z Q[2, 3] Q[7, 1] - z^2 Q[8, 2] + Q[2, 3] Q[7, 1] Q[8, 2]$

1 connected components

Jacobian={{0, 0, Q[2, 3]}, {-Q[7, 1], Q[8, 2], 0}, {2 Q[7, 1], -Q[8, 2], 0}}

Stability conditions

1

$Q[8, 2] < 0 \ \&\& \ ((Q[7, 1] < 0 \ \&\& \ Q[2, 3] > 0) \ || \ (Q[7, 1] > 0 \ \&\& \ Q[2, 3] < 0))$

2

$Q[8, 2] < 0 \ \&\& \ ((Q[2, 3] < 0 \ \&\& \ Q[7, 1] > 0) \ || \ (Q[2, 3] > 0 \ \&\& \ Q[7, 1] < 0))$

3

$(Q[7, 1] < 0 \ \&\& \ Q[2, 3] > 0 \ \&\& \ Q[8, 2] < 0) \ || \ (Q[7, 1] > 0 \ \&\& \ Q[2, 3] < 0 \ \&\& \ Q[8, 2] < 0)$

## #61

Triplet: Q5z Q7x Q8y

Eigenvalues:

{Root[Q[5, 3] Q[7, 1] Q[8, 2] + (-2 Q[5, 3] Q[7, 1] - Q[5, 3] Q[8, 2]) #1 - Q[8, 2] #1<sup>2</sup> + #1<sup>3</sup> &, 1],  
Root[Q[5, 3] Q[7, 1] Q[8, 2] + (-2 Q[5, 3] Q[7, 1] - Q[5, 3] Q[8, 2]) #1 - Q[8, 2] #1<sup>2</sup> + #1<sup>3</sup> &, 2],  
Root[Q[5, 3] Q[7, 1] Q[8, 2] + (-2 Q[5, 3] Q[7, 1] - Q[5, 3] Q[8, 2]) #1 - Q[8, 2] #1<sup>2</sup> + #1<sup>3</sup> &, 3]}

Char Polyn= $z^3 - 2 z Q[5, 3] Q[7, 1] - z^2 Q[8, 2] - z Q[5, 3] Q[8, 2] + Q[5, 3] Q[7, 1] Q[8, 2]$

1 connected components

Jacobian={{0, 0, Q[5, 3]}, {-Q[7, 1], Q[8, 2], -Q[5, 3]}, {2 Q[7, 1], -Q[8, 2], 0}}

Stability conditions



1

$$Q[8, 2] < 0 \ \&\& \ ((Q[7, 1] < 0 \ \&\& \ Q[5, 3] > 0) \ || \ (Q[7, 1] > -Q[8, 2] \ \&\& \ Q[5, 3] < 0))$$

2

$$Q[8, 2] < 0 \ \&\& \ ((Q[5, 3] < 0 \ \&\& \ Q[7, 1] > -Q[8, 2]) \ || \ (Q[5, 3] > 0 \ \&\& \ Q[7, 1] < 0))$$

3

$$(Q[7, 1] < 0 \ \&\& \ Q[5, 3] > 0 \ \&\& \ Q[8, 2] < 0) \ || \ (Q[7, 1] > 0 \ \&\& \ Q[5, 3] < 0 \ \&\& \ -Q[7, 1] < Q[8, 2] < 0)$$

## #62

Triplet: Q6z Q7x Q8y

$$\text{Eigenvalues: } \left\{ \text{Root}[-Q[6, 3] Q[7, 1] Q[8, 2] + 2 Q[6, 3] Q[7, 1] \#1 - Q[8, 2] \#1^2 + \#1^3 \ \&, 1], \right. \\ \left. \text{Root}[-Q[6, 3] Q[7, 1] Q[8, 2] + 2 Q[6, 3] Q[7, 1] \#1 - Q[8, 2] \#1^2 + \#1^3 \ \&, 2], \right. \\ \left. \text{Root}[-Q[6, 3] Q[7, 1] Q[8, 2] + 2 Q[6, 3] Q[7, 1] \#1 - Q[8, 2] \#1^2 + \#1^3 \ \&, 3] \right\}$$

$$\text{Char Polyn} = z^3 + 2 z Q[6, 3] Q[7, 1] - z^2 Q[8, 2] - Q[6, 3] Q[7, 1] Q[8, 2]$$

1 connected components

$$\text{Jacobian} = \{ \{0, 0, -Q[6, 3]\}, \{-Q[7, 1], Q[8, 2], 0\}, \{2 Q[7, 1], -Q[8, 2], 0\} \}$$

Stability conditions

1

$$Q[8, 2] < 0 \ \&\& \ ((Q[7, 1] < 0 \ \&\& \ Q[6, 3] < 0) \ || \ (Q[7, 1] > 0 \ \&\& \ Q[6, 3] > 0))$$

2

$$Q[8, 2] < 0 \ \&\& \ ((Q[6, 3] < 0 \ \&\& \ Q[7, 1] < 0) \ || \ (Q[6, 3] > 0 \ \&\& \ Q[7, 1] > 0))$$

3

$$(Q[7, 1] < 0 \ \&\& \ Q[6, 3] < 0 \ \&\& \ Q[8, 2] < 0) \ || \ (Q[7, 1] > 0 \ \&\& \ Q[6, 3] > 0 \ \&\& \ Q[8, 2] < 0)$$

## #63

Triplet: Q1x Q2z Q8y

Eigenvalues:

$$\left\{ \text{Root}[2 Q[1, 1] Q[2, 3] Q[8, 2] - Q[1, 1] Q[8, 2] \#1 + (Q[1, 1] - Q[8, 2]) \#1^2 + \#1^3 \ \&, 1], \right. \\ \left. \text{Root}[2 Q[1, 1] Q[2, 3] Q[8, 2] - Q[1, 1] Q[8, 2] \#1 + (Q[1, 1] - Q[8, 2]) \#1^2 + \#1^3 \ \&, 2], \right. \\ \left. \text{Root}[2 Q[1, 1] Q[2, 3] Q[8, 2] - Q[1, 1] Q[8, 2] \#1 + (Q[1, 1] - Q[8, 2]) \#1^2 + \#1^3 \ \&, 3] \right\}$$

$$\text{Char Polyn} = z^3 + z^2 Q[1, 1] - z^2 Q[8, 2] - z Q[1, 1] Q[8, 2] + 2 Q[1, 1] Q[2, 3] Q[8, 2]$$

1 connected components

$$\text{Jacobian} = \{ \{-Q[1, 1], 0, Q[2, 3]\}, \{2 Q[1, 1], Q[8, 2], 0\}, \{0, -Q[8, 2], 0\} \}$$

Stability conditions

1

$$Q[8, 2] < 0 \ \&\& \ \left( \left( Q[2, 3] \leq \frac{1}{2} Q[8, 2] \ \&\& \ Q[1, 1] > -2 Q[2, 3] + Q[8, 2] \right) \ || \ \right. \\ \left. \left( \frac{1}{2} Q[8, 2] < Q[2, 3] < 0 \ \&\& \ Q[1, 1] > 0 \right) \right)$$

2

$$Q[8, 2] < 0 \ \&\& \ Q[1, 1] > 0 \ \&\& \ \frac{1}{2} (-Q[1, 1] + Q[8, 2]) < Q[2, 3] < 0$$

3

$$Q[2, 3] < 0 \ \&\& \ ((0 < Q[1, 1] \leq -2 Q[2, 3] \ \&\& \ Q[8, 2] < Q[1, 1] + 2 Q[2, 3]) \ || \\ (Q[1, 1] > -2 Q[2, 3] \ \&\& \ Q[8, 2] < 0))$$

**#64**

Triplet: Q1x Q5z Q8y

Eigenvalues:

$$\left\{ \text{Root}\left[Q[1, 1] Q[5, 3] Q[8, 2] + (-Q[1, 1] Q[8, 2] - Q[5, 3] Q[8, 2]) \#1 + (Q[1, 1] - Q[8, 2]) \#1^2 + \#1^3 \ \&, 1\right], \text{Root}\left[Q[1, 1] Q[5, 3] Q[8, 2] + (-Q[1, 1] Q[8, 2] - Q[5, 3] Q[8, 2]) \#1 + (Q[1, 1] - Q[8, 2]) \#1^2 + \#1^3 \ \&, 2\right], \text{Root}\left[Q[1, 1] Q[5, 3] Q[8, 2] + (-Q[1, 1] Q[8, 2] - Q[5, 3] Q[8, 2]) \#1 + (Q[1, 1] - Q[8, 2]) \#1^2 + \#1^3 \ \&, 3\right] \right\}$$

Char Polyn=

$$z^3 + z^2 Q[1, 1] - z^2 Q[8, 2] - z Q[1, 1] Q[8, 2] - z Q[5, 3] Q[8, 2] + Q[1, 1] Q[5, 3] Q[8, 2]$$

1 connected components

Jacobian={{-Q[1, 1], 0, Q[5, 3]}, {2 Q[1, 1], Q[8, 2], -Q[5, 3]}, {0, -Q[8, 2], 0}}

Stability conditions

1

$$Q[8, 2] < 0 \ \&\& \ \left( \left( Q[5, 3] < 0 \ \&\& \ Q[1, 1] > \frac{1}{2} (-2 Q[5, 3] + Q[8, 2]) + \frac{1}{2} \sqrt{4 Q[5, 3]^2 + Q[8, 2]^2} \right) \ || \right. \\ \left. \left( Q[5, 3] > 0 \ \&\& \ \frac{1}{2} (-2 Q[5, 3] + Q[8, 2]) + \frac{1}{2} \sqrt{4 Q[5, 3]^2 + Q[8, 2]^2} < Q[1, 1] < 0 \right) \right)$$

2

$$Q[8, 2] < 0 \ \&\& \ \left( \left( \frac{1}{2} Q[8, 2] < Q[1, 1] < 0 \ \&\& \ Q[5, 3] > \frac{-Q[1, 1]^2 + Q[1, 1] Q[8, 2]}{2 Q[1, 1] - Q[8, 2]} \right) \ || \right. \\ \left. \left( Q[1, 1] > 0 \ \&\& \ \frac{-Q[1, 1]^2 + Q[1, 1] Q[8, 2]}{2 Q[1, 1] - Q[8, 2]} < Q[5, 3] < 0 \right) \right)$$

3

$$\left( Q[5, 3] < 0 \ \&\& \ \left( \left( -Q[5, 3] < Q[1, 1] \leq -2 Q[5, 3] \ \&\& \ Q[8, 2] < \frac{Q[1, 1]^2 + 2 Q[1, 1] Q[5, 3]}{Q[1, 1] + Q[5, 3]} \right) \ || \right. \right. \\ \left. \left. (Q[1, 1] > -2 Q[5, 3] \ \&\& \ Q[8, 2] < 0) \right) \right) \ || \\ \left( Q[5, 3] > 0 \ \&\& \ -Q[5, 3] < Q[1, 1] < 0 \ \&\& \ Q[8, 2] < \frac{Q[1, 1]^2 + 2 Q[1, 1] Q[5, 3]}{Q[1, 1] + Q[5, 3]} \right)$$

**#65**

Triplet: Q3x Q5z Q8y

$$\text{Eigenvalues: } \left\{ \text{Root}\left[-Q[3, 1] Q[5, 3] Q[8, 2] - Q[5, 3] Q[8, 2] \#1 - Q[8, 2] \#1^2 + \#1^3 \ \&, 1\right], \right. \\ \text{Root}\left[-Q[3, 1] Q[5, 3] Q[8, 2] - Q[5, 3] Q[8, 2] \#1 - Q[8, 2] \#1^2 + \#1^3 \ \&, 2\right], \\ \left. \text{Root}\left[-Q[3, 1] Q[5, 3] Q[8, 2] - Q[5, 3] Q[8, 2] \#1 - Q[8, 2] \#1^2 + \#1^3 \ \&, 3\right] \right\}$$

Char Polyn= $z^3 - z^2 Q[8, 2] - z Q[5, 3] Q[8, 2] - Q[3, 1] Q[5, 3] Q[8, 2]$ 

1 connected components

Jacobian={{0, 0, Q[5, 3]}, {-Q[3, 1], Q[8, 2], -Q[5, 3]}, {0, -Q[8, 2], 0}}

Stability conditions

1

$Q[8, 2] < 0 \ \&\& \ Q[5, 3] > 0 \ \&\& \ 0 < Q[3, 1] < -Q[8, 2]$

2

$Q[8, 2] < 0 \ \&\& \ 0 < Q[3, 1] < -Q[8, 2] \ \&\& \ Q[5, 3] > 0$

3

$Q[5, 3] > 0 \ \&\& \ Q[3, 1] > 0 \ \&\& \ Q[8, 2] < -Q[3, 1]$

## #66

Triplet: Q4x Q5z Q8y

Eigenvalues: {Root[Q[4, 1] Q[5, 3] Q[8, 2] - Q[5, 3] Q[8, 2] #1 - Q[8, 2] #1<sup>2</sup> + #1<sup>3</sup> &, 1],  
 Root[Q[4, 1] Q[5, 3] Q[8, 2] - Q[5, 3] Q[8, 2] #1 - Q[8, 2] #1<sup>2</sup> + #1<sup>3</sup> &, 2],  
 Root[Q[4, 1] Q[5, 3] Q[8, 2] - Q[5, 3] Q[8, 2] #1 - Q[8, 2] #1<sup>2</sup> + #1<sup>3</sup> &, 3]}

Char Polyn= $z^3 - z^2 Q[8, 2] - z Q[5, 3] Q[8, 2] + Q[4, 1] Q[5, 3] Q[8, 2]$

1 connected components

Jacobian={{0, 0, Q[5, 3]}, {Q[4, 1], Q[8, 2], -Q[5, 3]}, {0, -Q[8, 2], 0}}

Stability conditions

1

$Q[8, 2] < 0 \ \&\& \ Q[5, 3] > 0 \ \&\& \ Q[8, 2] < Q[4, 1] < 0$

2

$Q[8, 2] < 0 \ \&\& \ Q[8, 2] < Q[4, 1] < 0 \ \&\& \ Q[5, 3] > 0$

3

$Q[5, 3] > 0 \ \&\& \ Q[4, 1] < 0 \ \&\& \ Q[8, 2] < Q[4, 1]$

## #67

Triplet: Q1x Q6z Q8y

Eigenvalues:

{Root[-2 Q[1, 1] Q[6, 3] Q[8, 2] - Q[1, 1] Q[8, 2] #1 + (Q[1, 1] - Q[8, 2]) #1<sup>2</sup> + #1<sup>3</sup> &, 1],  
 Root[-2 Q[1, 1] Q[6, 3] Q[8, 2] - Q[1, 1] Q[8, 2] #1 + (Q[1, 1] - Q[8, 2]) #1<sup>2</sup> + #1<sup>3</sup> &, 2],  
 Root[-2 Q[1, 1] Q[6, 3] Q[8, 2] - Q[1, 1] Q[8, 2] #1 + (Q[1, 1] - Q[8, 2]) #1<sup>2</sup> + #1<sup>3</sup> &, 3]}

Char Polyn= $z^3 + z^2 Q[1, 1] - z^2 Q[8, 2] - z Q[1, 1] Q[8, 2] - 2 Q[1, 1] Q[6, 3] Q[8, 2]$

1 connected components

Jacobian={{-Q[1, 1], 0, -Q[6, 3]}, {2 Q[1, 1], Q[8, 2], 0}, {0, -Q[8, 2], 0}}

Stability conditions

1

$$Q[8, 2] < 0 \ \&\& \left( \left( 0 < Q[6, 3] \leq -\frac{1}{2} Q[8, 2] \ \&\& \ Q[1, 1] > 0 \right) \ || \right. \\ \left. \left( Q[6, 3] > -\frac{1}{2} Q[8, 2] \ \&\& \ Q[1, 1] > 2 Q[6, 3] + Q[8, 2] \right) \right)$$

2

$$Q[8, 2] < 0 \ \&\& \ Q[1, 1] > 0 \ \&\& \ 0 < Q[6, 3] < \frac{1}{2} (Q[1, 1] - Q[8, 2])$$

3

$$Q[6, 3] > 0 \ \&\& \\ ((0 < Q[1, 1] \leq 2 Q[6, 3] \ \&\& \ Q[8, 2] < Q[1, 1] - 2 Q[6, 3]) \ || \ (Q[1, 1] > 2 Q[6, 3] \ \&\& \ Q[8, 2] < 0))$$

## #68

Triplet: Q5x Q6z Q8y

Eigenvalues:

$$\left\{ \begin{array}{l} \text{Root}[Q[5, 1] Q[6, 3] Q[8, 2] + Q[5, 1] Q[8, 2] \#1 + (-Q[5, 1] - Q[8, 2]) \#1^2 + \#1^3 \ \&, 1], \\ \text{Root}[Q[5, 1] Q[6, 3] Q[8, 2] + Q[5, 1] Q[8, 2] \#1 + (-Q[5, 1] - Q[8, 2]) \#1^2 + \#1^3 \ \&, 2], \\ \text{Root}[Q[5, 1] Q[6, 3] Q[8, 2] + Q[5, 1] Q[8, 2] \#1 + (-Q[5, 1] - Q[8, 2]) \#1^2 + \#1^3 \ \&, 3] \end{array} \right\}$$

$$\text{Char Polyn} = z^3 - z^2 Q[5, 1] - z^2 Q[8, 2] + z Q[5, 1] Q[8, 2] + Q[5, 1] Q[6, 3] Q[8, 2]$$

1 connected components

$$\text{Jacobian} = \{ \{Q[5, 1], 0, -Q[6, 3]\}, \{-Q[5, 1], Q[8, 2], 0\}, \{0, -Q[8, 2], 0\} \}$$

Stability conditions

1

$$Q[8, 2] < 0 \ \&\& \\ ((0 < Q[6, 3] \leq -Q[8, 2] \ \&\& \ Q[5, 1] < 0) \ || \ (Q[6, 3] > -Q[8, 2] \ \&\& \ Q[5, 1] < -Q[6, 3] - Q[8, 2]))$$

2

$$Q[8, 2] < 0 \ \&\& \ Q[5, 1] < 0 \ \&\& \ 0 < Q[6, 3] < -Q[5, 1] - Q[8, 2]$$

3

$$Q[6, 3] > 0 \ \&\& \\ ((Q[5, 1] \leq -Q[6, 3] \ \&\& \ Q[8, 2] < 0) \ || \ (-Q[6, 3] < Q[5, 1] < 0 \ \&\& \ Q[8, 2] < -Q[5, 1] - Q[6, 3]))$$

## #69

Triplet: Q1z Q5x Q9y

$$\text{Eigenvalues: } \left\{ \begin{array}{l} \text{Root}[-Q[1, 3] Q[5, 1] Q[9, 2] + 2 Q[1, 3] Q[9, 2] \#1 - Q[5, 1] \#1^2 + \#1^3 \ \&, 1], \\ \text{Root}[-Q[1, 3] Q[5, 1] Q[9, 2] + 2 Q[1, 3] Q[9, 2] \#1 - Q[5, 1] \#1^2 + \#1^3 \ \&, 2], \\ \text{Root}[-Q[1, 3] Q[5, 1] Q[9, 2] + 2 Q[1, 3] Q[9, 2] \#1 - Q[5, 1] \#1^2 + \#1^3 \ \&, 3] \end{array} \right\}$$

$$\text{Char Polyn} = z^3 - z^2 Q[5, 1] + 2 z Q[1, 3] Q[9, 2] - Q[1, 3] Q[5, 1] Q[9, 2]$$

1 connected components

$$\text{Jacobian} = \{ \{Q[5, 1], 0, -Q[1, 3]\}, \{-Q[5, 1], 0, 2 Q[1, 3]\}, \{0, -Q[9, 2], 0\} \}$$

Stability conditions

1

$$(Q[9, 2] < 0 \ \&\& \ Q[5, 1] < 0 \ \&\& \ Q[1, 3] < 0) \ || \ (Q[9, 2] > 0 \ \&\& \ Q[5, 1] < 0 \ \&\& \ Q[1, 3] > 0)$$

2

$$(Q[9, 2] < 0 \ \&\& \ Q[1, 3] < 0 \ \&\& \ Q[5, 1] < 0) \ || \ (Q[9, 2] > 0 \ \&\& \ Q[1, 3] > 0 \ \&\& \ Q[5, 1] < 0)$$

3

$$Q[5, 1] < 0 \ \&\& \ ((Q[1, 3] < 0 \ \&\& \ Q[9, 2] < 0) \ || \ (Q[1, 3] > 0 \ \&\& \ Q[9, 2] > 0))$$

## #70

Triplet: Q1z Q5x Q10y

$$\text{Eigenvalues: } \left\{ \text{Root}\left[Q[1, 3] Q[5, 1] Q[10, 2] - 2 Q[1, 3] Q[10, 2] \#1 - Q[5, 1] \#1^2 + \#1^3 \ \&, 1\right], \right. \\ \left. \text{Root}\left[Q[1, 3] Q[5, 1] Q[10, 2] - 2 Q[1, 3] Q[10, 2] \#1 - Q[5, 1] \#1^2 + \#1^3 \ \&, 2\right], \right. \\ \left. \text{Root}\left[Q[1, 3] Q[5, 1] Q[10, 2] - 2 Q[1, 3] Q[10, 2] \#1 - Q[5, 1] \#1^2 + \#1^3 \ \&, 3\right] \right\}$$

$$\text{Char Polyn} = z^3 - z^2 Q[5, 1] - 2 z Q[1, 3] Q[10, 2] + Q[1, 3] Q[5, 1] Q[10, 2]$$

1 connected components

$$\text{Jacobian} = \{\{Q[5, 1], 0, -Q[1, 3]\}, \{-Q[5, 1], 0, 2 Q[1, 3]\}, \{0, Q[10, 2], 0\}\}$$

Stability conditions

1

$$(Q[10, 2] < 0 \ \&\& \ Q[5, 1] < 0 \ \&\& \ Q[1, 3] > 0) \ || \ (Q[10, 2] > 0 \ \&\& \ Q[5, 1] < 0 \ \&\& \ Q[1, 3] < 0)$$

2

$$(Q[10, 2] < 0 \ \&\& \ Q[1, 3] > 0 \ \&\& \ Q[5, 1] < 0) \ || \ (Q[10, 2] > 0 \ \&\& \ Q[1, 3] < 0 \ \&\& \ Q[5, 1] < 0)$$

3

$$Q[5, 1] < 0 \ \&\& \ ((Q[1, 3] < 0 \ \&\& \ Q[10, 2] > 0) \ || \ (Q[1, 3] > 0 \ \&\& \ Q[10, 2] < 0))$$

## #71

Triplet: Q1y Q7x Q8z

$$\text{Eigenvalues: } \left\{ \text{Root}\left[Q[1, 2] Q[7, 1] Q[8, 3] + \right. \right. \\ \left. \left. (-Q[1, 2] Q[7, 1] - 2 Q[1, 2] Q[8, 3]) \#1 + (-2 Q[1, 2] + Q[8, 3]) \#1^2 + \#1^3 \ \&, 1\right], \right. \\ \left. \text{Root}\left[Q[1, 2] Q[7, 1] Q[8, 3] + (-Q[1, 2] Q[7, 1] - 2 Q[1, 2] Q[8, 3]) \#1 + \right. \right. \\ \left. \left. (-2 Q[1, 2] + Q[8, 3]) \#1^2 + \#1^3 \ \&, 2\right], \text{Root}\left[Q[1, 2] Q[7, 1] Q[8, 3] + \right. \right. \\ \left. \left. (-Q[1, 2] Q[7, 1] - 2 Q[1, 2] Q[8, 3]) \#1 + (-2 Q[1, 2] + Q[8, 3]) \#1^2 + \#1^3 \ \&, 3\right] \right\}$$

Char Polyn=

$$z^3 - 2 z^2 Q[1, 2] - z Q[1, 2] Q[7, 1] + z^2 Q[8, 3] - 2 z Q[1, 2] Q[8, 3] + Q[1, 2] Q[7, 1] Q[8, 3]$$

1 connected components

$$\text{Jacobian} = \{\{0, -Q[1, 2], 0\}, \{-Q[7, 1], 2 Q[1, 2], Q[8, 3]\}, \{2 Q[7, 1], 0, -Q[8, 3]\}\}$$

Stability conditions

1

$$\left( Q[8, 3] < 0 \ \&\& \ Q[7, 1] > -2 Q[8, 3] \ \&\& \ Q[1, 2] < \frac{Q[7, 1] Q[8, 3] + Q[8, 3]^2}{Q[7, 1] + 2 Q[8, 3]} \right) \ || \\ \left( Q[8, 3] > 0 \ \&\& \ \left( \left( -2 Q[8, 3] < Q[7, 1] \leq -Q[8, 3] \ \&\& \ Q[1, 2] < \frac{Q[7, 1] Q[8, 3] + Q[8, 3]^2}{Q[7, 1] + 2 Q[8, 3]} \right) \ || \right. \right. \\ \left. \left. (-Q[8, 3] < Q[7, 1] < 0 \ \&\& \ Q[1, 2] < 0) \right) \right)$$

2

$$\left( Q[8, 3] < 0 \ \&\& \ Q[1, 2] < Q[8, 3] \ \&\& \ Q[7, 1] > \frac{-2 Q[1, 2] Q[8, 3] + Q[8, 3]^2}{Q[1, 2] - Q[8, 3]} \right) \ ||$$

$$\left( Q[8, 3] > 0 \ \&\& \ Q[1, 2] < 0 \ \&\& \ \frac{-2 Q[1, 2] Q[8, 3] + Q[8, 3]^2}{Q[1, 2] - Q[8, 3]} < Q[7, 1] < 0 \right)$$

3

$$\left( Q[7, 1] < 0 \ \&\& \ Q[1, 2] < 0 \ \&\& \ Q[8, 3] > \frac{1}{2} (2 Q[1, 2] - Q[7, 1]) + \frac{1}{2} \sqrt{4 Q[1, 2]^2 + Q[7, 1]^2} \right) \ ||$$

$$\left( Q[7, 1] > 0 \ \&\& \ Q[1, 2] < 0 \ \&\& \ \frac{1}{2} (2 Q[1, 2] - Q[7, 1]) + \frac{1}{2} \sqrt{4 Q[1, 2]^2 + Q[7, 1]^2} < Q[8, 3] < 0 \right)$$

## #72

Triplet: Q5y Q7x Q8z

Eigenvalues:

$$\left\{ \text{Root}[-Q[5, 2] Q[7, 1] Q[8, 3] + (Q[5, 2] Q[7, 1] + Q[5, 2] Q[8, 3]) \#1 + (Q[5, 2] + Q[8, 3]) \#1^2 + \#1^3 \ \& \ 1], \text{Root}[-Q[5, 2] Q[7, 1] Q[8, 3] + (Q[5, 2] Q[7, 1] + Q[5, 2] Q[8, 3]) \#1 + (Q[5, 2] + Q[8, 3]) \#1^2 + \#1^3 \ \& \ 2], \text{Root}[-Q[5, 2] Q[7, 1] Q[8, 3] + (Q[5, 2] Q[7, 1] + Q[5, 2] Q[8, 3]) \#1 + (Q[5, 2] + Q[8, 3]) \#1^2 + \#1^3 \ \& \ 3] \right\}$$

Char Polyn=

$$z^3 + z^2 Q[5, 2] + z Q[5, 2] Q[7, 1] + z^2 Q[8, 3] + z Q[5, 2] Q[8, 3] - Q[5, 2] Q[7, 1] Q[8, 3]$$

1 connected components

Jacobian={{0, Q[5, 2], 0}, {-Q[7, 1], -Q[5, 2], Q[8, 3]}, {2 Q[7, 1], 0, -Q[8, 3]}}

Stability conditions

1

$$\left( Q[8, 3] < 0 \ \&\& \ Q[7, 1] > -Q[8, 3] \ \&\& \ Q[5, 2] > \frac{-2 Q[7, 1] Q[8, 3] - Q[8, 3]^2}{Q[7, 1] + Q[8, 3]} \right) \ ||$$

$$\left( Q[8, 3] > 0 \ \&\& \ \left( \left( -Q[8, 3] < Q[7, 1] \leq -\frac{1}{2} Q[8, 3] \ \&\& \ Q[5, 2] > \frac{-2 Q[7, 1] Q[8, 3] - Q[8, 3]^2}{Q[7, 1] + Q[8, 3]} \right) \ || \right. \right.$$

$$\left. \left. \left( -\frac{1}{2} Q[8, 3] < Q[7, 1] < 0 \ \&\& \ Q[5, 2] > 0 \right) \right) \right)$$

2

$$\left( Q[8, 3] < 0 \ \&\& \ Q[5, 2] > -2 Q[8, 3] \ \&\& \ Q[7, 1] > \frac{-Q[5, 2] Q[8, 3] - Q[8, 3]^2}{Q[5, 2] + 2 Q[8, 3]} \right) \ ||$$

$$\left( Q[8, 3] > 0 \ \&\& \ Q[5, 2] > 0 \ \&\& \ \frac{-Q[5, 2] Q[8, 3] - Q[8, 3]^2}{Q[5, 2] + 2 Q[8, 3]} < Q[7, 1] < 0 \right)$$

3

$$\left( Q[7, 1] < 0 \ \&\& \ Q[5, 2] > 0 \ \&\& \ Q[8, 3] > \frac{1}{2} (-Q[5, 2] - 2 Q[7, 1]) + \frac{1}{2} \sqrt{Q[5, 2]^2 + 4 Q[7, 1]^2} \right) \ ||$$

$$\left( Q[7, 1] > 0 \ \&\& \ Q[5, 2] > 0 \ \&\& \ \frac{1}{2} (-Q[5, 2] - 2 Q[7, 1]) + \frac{1}{2} \sqrt{Q[5, 2]^2 + 4 Q[7, 1]^2} < Q[8, 3] < 0 \right)$$
